# Supplementary material
Source: publisher figshare collection journal article supplement (https://acs.figshare.com/ndownloader/files/3838465)
Supplement: Supplementary file 1 [file 3838465]

## Sheet: Supplementary Table 3
Supplementary Table 3. The formerly N-linked glycopeptides identified only in their glycosylated forms from OVCAR-3 cells
Sequencea	Leading razor protein	Protein name
AACAVKPQEVQMVN#GTITNPINGK	gi|119964726	cation-independent mannose-6-phosphate receptor precursor
AAEN#FTLLVK	gi|378404897	P2X purinoceptor 4 isoform 1
AALSWSNGN#GTASCR	gi|148728162	receptor-type tyrosine-protein phosphatase eta isoform 1 precursor
AAN#YTSSLNLPDK	gi|214010218	semaphorin-4D isoform 1 precursor
AASN#FTEIK	gi|4507157	sortilin-related receptor preproprotein
AASTYSIDSVSFSYNTGDN#TTFPDAEDK	gi|169790833	lysosome-associated membrane glycoprotein 2 isoform C precursor
AAVHQIN#FTVGQTSEWIHGIQR	gi|33598924	scavenger receptor class A member 3 isoform 1
AAVPGN#TSTPSCQSTNGQPQR	gi|5453579	bone morphogenetic protein 1 isoform 3 precursor
AAVPKN#VSVAEGK	gi|41152506	prostaglandin F2 receptor negative regulator precursor
ACDGIGTGSLMSAQTVDSSNIDKFIN#CTK	gi|4885215	receptor tyrosine-protein kinase erbB-4 isoform JM-a/CVT-1 precursor
ACVAGFTN#ITFHPQNK	gi|148728162	receptor-type tyrosine-protein phosphatase eta isoform 1 precursor
ADIFIN#GSQLGEDFIQLHK	gi|148746204	heparanase isoform 1 preproprotein
AEAVGETLTLPGLVSADN#GTYTCEASNK	gi|21686977	cell adhesion molecule 4 precursor
AEDTAGQTALTVMRPDASLQVDTVVPN#ATVSEK	gi|55953133	immunoglobulin superfamily member 3 isoform 1 precursor
AEFN#ITLIHPK	gi|157266300	aminopeptidase N precursor
AELDLRPHGLGLFEN#SSAPR	gi|189571583	intercellular adhesion molecule 5 precursor
AEVAN#LSAHSASPIQDAVLK	gi|22538495	putative polypeptide N-acetylgalactosaminyltransferase-like protein 3
AEVAN#LSAHSASPIQDAVLKR	gi|22538495	putative polypeptide N-acetylgalactosaminyltransferase-like protein 3
AFIN#GTGVETVVSADLPNAHGLAVDWVSR	gi|126012562	prolow-density lipoprotein receptor-related protein 1 precursor
AFSN#SSYVLNPTTGELVFDPLSASDTGEYSCEAR	gi|8393638	junctional adhesion molecule A precursor
AFSTLLVN#VSGK	gi|381342465	sodium/hydrogen exchanger 7 isoform 1 precursor
AFYN#ESWER	gi|47933387	solute carrier family 2, facilitated glucose transporter member 9 isoform 1
AGKPSAAAASVSTQHGSILQLN#DTLEEK	gi|150378452	heparan-alpha-glucosaminide N-acetyltransferase precursor
AGPN#GTLFVADAYK	gi|24308201	adipocyte plasma membrane-associated protein
AGQPATAFSQQDLLDGAVLYSHN#GSLSPR	gi|47419930	chondroitin sulfate proteoglycan 4 precursor
AGYFN#FTSATITYLAQEDGPVVIGSTSAPGQGGILAQR	gi|4507239	translocon-associated protein subunit beta precursor
AHCVWLECPIPDAPVVTN#VTVK	gi|6006011	integrin alpha-3 isoform b precursor
AIDTIYQTTDFSGIRN#ISFMVK	gi|4557251	disintegrin and metalloproteinase domain-containing protein 10 precursor
AIN#DTAAR	gi|13435364	desmocollin-2 isoform Dsc2a preproprotein
AIN#QTAVECTWTGPR	gi|4507157	sortilin-related receptor preproprotein
AIWTLNPNYLSN#GTLAAPVVVLPDLDEDGVR	gi|62821776	uncharacterized protein KIAA1467
AKADQLIQTLHAVDKDDPYSGHQFSFSLAPEAASGSN#FTIQDNK	gi|4826673	cadherin-6 preproprotein
ALAYGEKN#LTFEGPLPEK	gi|24850115	sialate O-acetylesterase isoform 1 precursor
ALAYGEKN#LTFEGPLPEKIELLAHK	gi|24850115	sialate O-acetylesterase isoform 1 precursor
ALENGIN#VTVSQSTTVVNGR	gi|122937400	teneurin-3
ALESSAPNLQLETSDVLAN#VTYLK	gi|260764009	prominin-2 precursor
ALEVN#MSLSGR	gi|7656940	SUN domain-containing ossification factor isoform 1 precursor
ALHALN#VTWR	gi|50659093	epididymis-specific alpha-mannosidase precursor
ALLSITDN#SSSSDIVESSTSYIK	gi|153792110	protein HEG homolog 1 precursor
ALLTN#VSSVALGSR	gi|429836859	multiple epidermal growth factor-like domains protein 8 isoform 1 precursor
ALMN#GSESR	gi|38372919	basigin isoform 1 precursor
ALMVLTEEPLLYIPPPPCQPLIN#TTESLR	gi|56786157	cyclic AMP-dependent transcription factor ATF-6 alpha
ALPGGADN#ASVASGAAASPGPQR	gi|17402888	neuronal pentraxin receptor
ALQWNAGSGGLPEN#ETTFAR	gi|71852584	arylsulfatase D precursor
ALRDLEVLTLNNNN#ITR	gi|4759146	slit homolog 2 protein precursor
ALSN#ISLR	gi|149363636	plexin-B2 precursor
ALSPN#STISSAPK	gi|313760643	SUN domain-containing protein 2 isoform a
ALSQQN#VSMDLATFMK	gi|53988380	mesothelin isoform 2 preproprotein
ALVN#FTR	gi|126012571	basement membrane-specific heparan sulfate proteoglycan core protein precursor
ALWLLN#GSMGLSDGQGGYR	gi|28872814	semaphorin-4G isoform 1 precursor
ALYELAGGTN#FSDTVQADPQTVTR	gi|24638433	nicastrin precursor
AMN#TSQVEALGIQMLPGYR	gi|31377697	procollagen galactosyltransferase 1 precursor
AMSSN#ETAAYK	gi|30578410	dolichyl-diphosphooligosaccharide--protein glycosyltransferase subunit STT3B
AMYVN#LTLTGEPIR	gi|170014689	VPS10 domain-containing receptor SorCS2 precursor
AN#ATIEVK	gi|6912646	neuroplastin isoform b precursor
AN#DSFGEASIIFSNGR	gi|126012573	low-density lipoprotein receptor-related protein 2 precursor
AN#ESRLEEADQLYR	gi|224809432	transmembrane and TPR repeat-containing protein 3
AN#GTGYFYVLAPK	gi|21265058	A disintegrin and metalloproteinase with thrombospondin motifs 15 preproprotein
AN#HSGAVVLLK	gi|119395740	integrin alpha-6 isoform a precursor
ANIQFGDN#GTTISAVSNK	gi|5031631	lysosome membrane protein 2 isoform 1 precursor
AN#ISSPGLIYTYTQDPTVTR	gi|59710104	plexin-A3 precursor
AN#LTVVLLR	gi|167466198	intercellular adhesion molecule 1 precursor
AN#LTWSVK	gi|51873064	lysosomal alpha-mannosidase isoform 1 precursor
AN#NSWFQSILR	gi|24638433	nicastrin precursor
AN#STGTLVITDPTR	gi|28373117	contactin-1 isoform 1 precursor
AN#TSQPGVLQGGAVYLCPWGASPTQCTPIEFDSK	gi|56237029	integrin alpha-5 precursor
AN#TTQPGIVEGGQVLK	gi|4504763	integrin alpha-V isoform 1 precursor
AN#YTGQIVLYSVNENGN#ITVIQAHR	gi|116295258	integrin alpha-2 precursor
APDSN#CSNLLITTR	gi|62821776	uncharacterized protein KIAA1467
APGLTSVAVASVNN#YTAVFLGTVNGR	gi|157694524	plexin-D1 precursor
APPRN#YSVIVMFTALQLHR	gi|215983058	magnesium transporter protein 1
APQHVVNHLPPYTN#VSLK	gi|208431815	receptor-type tyrosine-protein phosphatase kappa isoform a precursor
AQAALDKAN#ASR	gi|119703755	laminin subunit beta-2 precursor
AQEALSMGN#ATFYEVESILK	gi|157419138	laminin subunit gamma-2 isoform a precursor
AQEEVKIPLVN#ISLLPK	gi|38202211	N-acetylglucosamine-1-phosphotransferase subunits alpha/beta precursor
AQLTNPEVKYN#YTEDPTILR	gi|262118282	plexin-A1 precursor
AQQLLAN#STALEEAMLQEQQR	gi|21264602	laminin subunit alpha-5 precursor
ARLNN#ITIIGPLDMK	gi|197116389	transmembrane protein 106B
ARN#ISGVVLADHSGAFHNK	gi|24638433	nicastrin precursor
ASDEDSEVN#YSIK	gi|13787217	protocadherin Fat 2 precursor
ASEYTVSIQSN#VSK	gi|13787217	protocadherin Fat 2 precursor
ASMN#TSSNPGTPLPLPLR	gi|197333692	leucine-rich repeat-containing protein 8B
ASSEVNLANLPPSYHN#ETNTDTK	gi|40548389	dickkopf-related protein 3 precursor
ASSSWQSVN#ESGDQVHWSPGQAR	gi|27735143	discoidin, CUB and LCCL domain-containing protein 1 precursor
ASTCSFNPGVFVAN#LTEWK	gi|23510346	glycosyltransferase 8 domain-containing protein 1
ASVSFLNFN#LSNCER	gi|30410805	CUB domain-containing protein 1 isoform 1 precursor
ATGTAHFFNFLLN#TTDYR	gi|188497703	semaphorin-3F precursor
ATN#ATLDPR	gi|166362740	proteinase-activated receptor 1 precursor
ATSSTSVTN#STGSALPK	gi|83367077	mucin-16
ATVAAGNSVVQVVN#VSR	gi|257467654	UPF0606 protein KIAA1549 isoform 2
ATVFAN#GSLLLTQVRPR	gi|393715082	inactive tyrosine-protein kinase 7 isoform e
ATVPVYIN#TTNANK	gi|13787217	protocadherin Fat 2 precursor
ATYIGTSN#WSGNYFTETAGTSLLVTQNGR	gi|166197683	phospholipase D3
AVGN#STFAIACLQR	gi|21361787	tetratricopeptide repeat protein 17
AVIYSLN#FTANPPQR	gi|130978359	tectonic-1 isoform 1 precursor
AVLPCVLLN#YSGIVQWTK	gi|166295173	kin of IRRE-like protein 1 precursor
AVLVNN#ITTGER	gi|29550838	Golgi membrane protein 1
AVYEALRN#CSFEDDNIR	gi|153791362	glucoside xylosyltransferase 1 isoform 1
AWAAN#GSMGEPVIK	gi|115305569	adenosine receptor A1
AYLLPAPPAPGN#ASESEEDR	gi|62243068	insulin-like growth factor-binding protein 3 isoform b precursor
AYLLPAPPAPGN#ASESEEDRSAGSVESPSVSSTHR	gi|62243068	insulin-like growth factor-binding protein 3 isoform b precursor
AYVAVDGIPQGVLERNNVITLN#ITGK	gi|119372308	beta-galactosidase isoform a preproprotein
CCGAAN#YTDWEK	gi|383872447	CD63 antigen isoform A
CFDAMEVDALN#SSHPVSTPVENPAQIR	gi|94818901	endoplasmic reticulum aminopeptidase 1 isoform a precursor
CGALQGLYTTVDFGTGSN#ITDAFLSQR	gi|119372308	beta-galactosidase isoform a preproprotein
CIPVMEAQEYIAN#VTSSSSAK	gi|31044432	LEM domain-containing protein 2 isoform 1
CLIEVN#ETITQISWEK	gi|11386199	poliovirus receptor-related protein 3 isoform 1 precursor
CLSPDVTPCFCTIN#FTLEK	gi|8922720	cell cycle control protein 50A isoform 1
CN#ASSQFLCSSGR	gi|126012562	prolow-density lipoprotein receptor-related protein 1 precursor
CNMIN#GTDGDSFHPLITK	gi|5031631	lysosome membrane protein 2 isoform 1 precursor
CTLIDALN#VTR	gi|38569405	arylsulfatase B isoform 1 precursor
DADACN#ATNWIEYMFNK	gi|255652944	Niemann-Pick C1 protein precursor
DAGVGFPEYQEEDN#STYNFR	gi|119964726	cation-independent mannose-6-phosphate receptor precursor
DAGVLN#DTLVIFTSDNGIPFPSGR	gi|4506919	N-sulphoglucosamine sulphohydrolase precursor
DALSLQFEPVLLPTSTTN#FTK	gi|196114949	transmembrane protein 131-like isoform 1 precursor
DATGNVN#DTIVTELTN#CTSAACK	gi|4506975	solute carrier family 12 member 2 isoform 1
DCADGSDEEACPLLAN#VTAASTPTQLGR	gi|4507157	sortilin-related receptor preproprotein
DCDVLTAVSEFFN#ASCVPVNNPK	gi|134244281	melanotransferrin isoform 1 precursor
DDAGN#YTCIASNGPQGQIR	gi|393715082	inactive tyrosine-protein kinase 7 isoform e
DDPYSGHQFSFSLAPEAASGSN#FTIQDNKDNTAGILTR	gi|4826673	cadherin-6 preproprotein
DEDDDCTYSYTMEGDGAPGPN#STVLVHK	gi|54607035	integrin beta-4 isoform 1 precursor
DEGLCSAN#VTR	gi|5730091	tissue factor pathway inhibitor 2 isoform 1 precursor
DFAN#MTSLVHLTLSR	gi|149773484	leucine-rich repeat and fibronectin type III domain-containing protein 1 precursor
DFEDLYTPVN#GSIVIVR	gi|189458817	transferrin receptor protein 1
DFN#ETQLAR	gi|14149904	anthrax toxin receptor 1 isoform 1 precursor
DFTQLHQN#ATLELK	gi|38788416	laminin subunit alpha-1 precursor
DGEAFEIN#GTEDGR	gi|27894376	neural cell adhesion molecule L1-like protein isoform 1 precursor
DGGLPSLQSN#ATVR	gi|296434287	protocadherin-19 isoform c precursor
DGN#SSLIAAVAEVR	gi|4557679	protein jagged-1 precursor
DGQLLPSSN#YSNIK	gi|336285440	neural cell adhesion molecule 1 isoform 5 precursor
DGTPLSDGQSN#HTVSSK	gi|393715082	inactive tyrosine-protein kinase 7 isoform e
DGTQQAVPLEHPSSPWGLN#LTEK	gi|4557733	latent-transforming growth factor beta-binding protein 2 precursor
DGYEPCVNEGMCVTYHN#GTGYCK	gi|24041035	neurogenic locus notch homolog protein 2 isoform 1 preproprotein
DGYMVVN#VSSLSLNEPEDK	gi|211971058	protein GPR107 isoform 1 precursor
DGYMVVN#VSSLSLNEPEDKDVTIGFSLDR	gi|211971058	protein GPR107 isoform 1 precursor
DHVN#VSMVEVTDFPFN#TSEWEGYLPK	gi|27765091	beta-galactoside alpha-2,6-sialyltransferase 1 isoform a
DHVVVPAN#TTSVILSGLRPYSSYHLEVQAFNGR	gi|4557707	neural cell adhesion molecule L1 isoform 1 precursor
DIGN#YSCAAQGTQTGSK	gi|7656967	cadherin EGF LAG seven-pass G-type receptor 1 precursor
DIIN#NTSLAELEK	gi|4505611	poly(A)-specific ribonuclease PARN isoform 1
DIN#GTLLSQATCELCDGNENSFMVVNALGDR	gi|187281580	Meckelin isoform 1 precursor
DINSQQELQN#ITTDTR	gi|109633041	receptor-type tyrosine-protein phosphatase F isoform 1 precursor
DIN#TTAQNIMFYDMGSGSTVCTIVTYQMVK	gi|195976805	hypoxia up-regulated protein 1 precursor
DIVGN#LTELESEDIQIEALLMR	gi|54633312	Golgi apparatus protein 1 isoform 1 precursor
DIVSSDFLSN#MSMDFQNHLGSCQK	gi|29725609	epidermal growth factor receptor isoform a precursor
DIYTFDGALN#KSTVPTDFSSAKIEVSQLLK	gi|4502673	leukocyte surface antigen CD47 isoform 1 precursor
DKLRPIIISMN#YSLPLR	gi|6006011	integrin alpha-3 isoform b precursor
DKLVLPAKN#TTNLK	gi|33519481	neural cell adhesion molecule 2 precursor
DKN#GTRAEPPLN#ASASDQGEK	gi|195976805	hypoxia up-regulated protein 1 precursor
DLAN#MTGLLHLSLSR	gi|13375646	leucine-rich repeat and fibronectin type-III domain-containing protein 3 precursor
DLDTDFTNN#ASQPETK	gi|22202611	carboxypeptidase D isoform 1 precursor
DLEITN#ATLQSEEDSR	gi|11641261	endoplasmic reticulum aminopeptidase 2
DLEVLTLNNNN#ITR	gi|4759146	slit homolog 2 protein precursor
DLGN#LTHLFLHGNR	gi|13194201	reticulon-4 receptor precursor
DLGPTLAN#STHHNVR	gi|54607043	glucosylceramidase isoform 1 precursor
DLGQGQGQVQVQN#GTLR	gi|205277425	protein turtle homolog A isoform a precursor
DLNGNVFQDAVFN#QTVTVIER	gi|169404009	translocon-associated protein subunit alpha precursor
DLPIMFDVLIHDPSHFLN#YSTINYK	gi|52694752	transmembrane glycoprotein NMB isoform a precursor
DLQGNPIAN#ATISVEGIDHDVTSAK	gi|4503009	carboxypeptidase E preproprotein
DLVEPDGQLILDDSLIYDNEGDQVKN#GTNMK	gi|256000767	extracellular matrix protein FRAS1 isoform 1 precursor
DLVPATN#YSLR	gi|27597078	tyrosine-protein kinase receptor TYRO3 precursor
DLVVQQAGTN#KTDVVCGPQDR	gi|4507581	tumor necrosis factor receptor superfamily member 5 isoform 1 precursor
DLVVQQLVN#VSR	gi|94681046	metal transporter CNNM4 precursor
DLYEYSWVQGPLHSN#ETDR	gi|24638433	nicastrin precursor
DLYEYSWVQGPLHSN#ETDRLPR	gi|24638433	nicastrin precursor
DMN#QTLGDN#ITVK	gi|21314755	signal peptide peptidase-like 2A precursor
DMSDEVGCVN#VTLCEGPNK	gi|4504975	low-density lipoprotein receptor isoform 1 precursor
DMSDGFISN#LTIQR	gi|217272849	prolyl 4-hydroxylase subunit alpha-1 isoform 2 precursor
DMVTYFMN#LSQANAQGTPR	gi|57242798	acid sphingomyelinase-like phosphodiesterase 3b isoform 1 precursor
DN#ATDSVPLR	gi|126012562	prolow-density lipoprotein receptor-related protein 1 precursor
DN#FTCVTDGLCFVSVTETTDK	gi|4759226	TGF-beta receptor type-1 isoform 1 precursor
DN#LTAFQK	gi|238859593	UDP-glucose:glycoprotein glucosyltransferase 2 precursor
DN#STLAVDIYK	gi|295293167	natural resistance-associated macrophage protein 2 isoform 1
DPEITNLIN#STR	gi|38327526	carboxypeptidase M precursor
DPNSGFVFNLNPLN#SSQGYN#VSGIGK	gi|119964726	cation-independent mannose-6-phosphate receptor precursor
DPYCAWSVN#TSR	gi|157388902	semaphorin-4C precursor
DQCIVDDITYNVN#DTFHK	gi|47132557	fibronectin isoform 1 preproprotein
DQGSPALSAN#VSLR	gi|11128037	protocadherin gamma-B1 isoform 1 precursor
DRGAAHSLEPGKENLPGDPTSN#ATSR	gi|4503489	ephrin-B3 precursor
DSCQQGSN#MTLIGENGHSTDTLTGSGFR	gi|194328809	latent-transforming growth factor beta-binding protein 3 isoform 1 precursor
DSGIWINGFDYTGISHITPHIPEIN#DSIR	gi|55749804	endoplasmic reticulum metallopeptidase 1
DSITGSGLEN#ATISVAGINHN#ITTGR	gi|22202611	carboxypeptidase D isoform 1 precursor
DSLEVGVTYN#CTCGCSVGLEPNSAR	gi|20127446	integrin beta-5 precursor
DSLFINGYAPQN#LSIR	gi|83367077	mucin-16
DSLN#SSHPISSSVQSSEQIEEMFDSLSYFK	gi|61742777	leucyl-cystinyl aminopeptidase isoform 1
DSLSIN#ATNIK	gi|29725609	epidermal growth factor receptor isoform a precursor
DSPVLPVTLQCN#LTSSSHTLTYSYWTK	gi|6912646	neuroplastin isoform b precursor
DSSGN#ETHFTGNEVGFFKPISCR	gi|14042945	TM2 domain-containing protein 1 precursor
DSTPLGDGPMLSLSSITFDSN#GTYVCEASLPTVPVLSR	gi|31543106	basal cell adhesion molecule isoform 1 precursor
DSVIN#LSESVEDGPK	gi|51477714	alpha-mannosidase 2
DTAVEGEEIEVN#CTAMASKPATTIR	gi|148664190	cell adhesion molecule 1 isoform 1 precursor
DTDAPGGHILN#VSLSVGQPPGPGGGPPFLPSEDLQER	gi|13325064	cadherin EGF LAG seven-pass G-type receptor 2 precursor
DTFN#DSAAPQSTTWPETSPR	gi|83367077	mucin-16
DTGELN#VTSILDR	gi|116534898	desmoglein-2 preproprotein
DTGELN#VTSILDREETPFFLLTGYALDAR	gi|116534898	desmoglein-2 preproprotein
DVAGLSQELLN#TSASLSR	gi|38788416	laminin subunit alpha-1 precursor
DVLQNHLTEVLTLVAMELPHN#VSSAEAVLR	gi|52145310	GDH/6PGL endoplasmic bifunctional protein precursor
DVN#CSVMGPQEK	gi|189083844	dipeptidyl peptidase 1 isoform a preproprotein
DVN#YTQIVVDR	gi|214010218	semaphorin-4D isoform 1 precursor
DVQIIVFPEDGIHGFN#FTR	gi|4557373	biotinidase precursor
DVSSNPEQLFFN#ITAFGK	gi|333360873	A disintegrin and metalloproteinase with thrombospondin motifs 3 preproprotein
DVTVIEGEVATISCQVN#KSDDSVIQLLNPNR	gi|148664190	cell adhesion molecule 1 isoform 1 precursor
DVYALMGQN#VTLECFALGNPVPDIR	gi|28373117	contactin-1 isoform 1 precursor
DVYSN#LSHLPGAPGGPPAPQGLPYCPER	gi|315467841	beta-1,4-galactosyltransferase 3
DWMPNN#HSVILIDDFESPQK	gi|145580617	alpha-(1,3)-fucosyltransferase 11 precursor
DYFTDLITN#ESINYFK	gi|189571636	extracellular sulfatase Sulf-1 precursor
DYGSQEDFTQVWN#TTMK	gi|21264578	tetraspanin-1
DYLTDLITN#DSVSFFR	gi|240255483	extracellular sulfatase Sulf-2 isoform a precursor
DYN#SSREDSLQDAWDYVQAQVK	gi|4504813	CD82 antigen isoform 1
DYSLTFGAIN#QTWSYR	gi|144953895	nidogen-2 precursor
DYYIISTSN#GSLEGLDNQEGGVCQTR	gi|4758250	ephrin-B2 precursor
DYYLN#KTENEK	gi|4503443	endothelin-converting enzyme 1 isoform 1
DYYPIN#ESLASLPLR	gi|4502897	cleft lip and palate transmembrane protein 1
EAATSLSNPIEIDFQTSGPIFN#ASVHSDTPSVIR	gi|41152506	prostaglandin F2 receptor negative regulator precursor
EADN#HTAFIR	gi|150456424	transmembrane protein 131
EAESLQPMTVVGTDYVFHN#DTK	gi|149363636	plexin-B2 precursor
EAETIKNGIYN#ITVLASDQGGR	gi|13435364	desmocollin-2 isoform Dsc2a preproprotein
EAGN#ITTDGYEILGK	gi|93141047	collagen alpha-1(XII) chain long isoform precursor
EAIN#ITLDHK	gi|33636742	procollagen-lysine,2-oxoglutarate 5-dioxygenase 2 isoform 1 precursor
EAQN#QSICSLAELLELAK	gi|189571657	glycerophosphodiester phosphodiesterase domain-containing protein 5
EASQN#ITYICK	gi|89363017	collagen alpha-2(V) chain preproprotein
EAVAECLNHN#LTIFFDVK	gi|7706617	glycerophosphodiester phosphodiesterase 1
EAVFAVNALN#ISEK	gi|214010218	semaphorin-4D isoform 1 precursor
EDAQIN#TTIGSVTAQDPDAAR	gi|4826673	cadherin-6 preproprotein
EDAQIN#TTIGSVTAQDPDAARNPVK	gi|4826673	cadherin-6 preproprotein
EDFASNEVVYYNAKDDLDPEKN#DSEPGSQR	gi|54112390	voltage-dependent calcium channel subunit alpha-2/delta-1 precursor
EDFHYN#DTAGYFIIGGSR	gi|154689719	protein sel-1 homolog 3
EDKSYN#VTSVLFR	gi|38455402	neutrophil gelatinase-associated lipocalin precursor
EEAMLYHN#QTAELR	gi|5454038	synaptonemal complex protein SC65 precursor
EEDVSITSN#LSSIDSFYTMVQDQLR	gi|122937400	teneurin-3
EERPLN#ASALK	gi|14149653	torsin-1B precursor
EETLLYDSN#TSSMADR	gi|61742777	leucyl-cystinyl aminopeptidase isoform 1
EETLLYDSN#TSSMADRK	gi|61742777	leucyl-cystinyl aminopeptidase isoform 1
EFEN#GSICVECDPQCEK	gi|4885215	receptor tyrosine-protein kinase erbB-4 isoform JM-a/CVT-1 precursor
EGFSAN#YSVLQSSVSEDFK	gi|182508169	neuropilin-1 isoform a precursor
EGGTMALSGISDFGN#ISATAGEN#YSVVSWVPK	gi|4557707	neural cell adhesion molecule L1 isoform 1 precursor
EGHFYYN#ISEVK	gi|5453914	phospholipid transfer protein isoform a precursor
EGICNGFTALCPASDPKPN#FTDCNR	gi|4557251	disintegrin and metalloproteinase domain-containing protein 10 precursor
EGKFDEVYEALTHAHPN#LTVYK	gi|11034849	ectonucleotide pyrophosphatase/phosphodiesterase family member 5 precursor
EGPPAAFSGHN#ASSGR	gi|112420992	protein crumbs homolog 2 precursor
EGSGYFFLN#TSTADVVK	gi|27477134	nuclear pore membrane glycoprotein 210 precursor
EGSLPGN#STISIR	gi|38045910	laminin subunit alpha-3 isoform 1 precursor
EIAN#ATAKPEDRNDPMLLYNK	gi|116256327	neprilysin
EIFVAN#GTQGK	gi|4506357	myelin protein zero-like protein 1 isoform a precursor
EINSLN#LTESHNSR	gi|119395740	integrin alpha-6 isoform a precursor
EKDLN#ETLLR	gi|4885523	noggin precursor
EKLN#DTYVNVGLYSTK	gi|195972881	transmembrane protein 194A isoform a
EKPEAGTYSVNNGN#DTCLLATMGLQLN#ITQDK	gi|169790833	lysosome-associated membrane glycoprotein 2 isoform C precursor
EKVEN#GSETGPLPPELQPLLEGEVK	gi|21361163	vitamin K-dependent gamma-carboxylase isoform 1
ELDLTCN#ITTDR	gi|41152506	prostaglandin F2 receptor negative regulator precursor
ELGLYNLMN#ITR	gi|119395736	insulin receptor isoform Long preproprotein
ELGPLYTN#ITADIGTDPR	gi|315467841	beta-1,4-galactosyltransferase 3
ELKLN#ASLPALLLIR	gi|17136148	V-type proton ATPase subunit S1 precursor
ELLLDFAN#SSAELTGCLVR	gi|30025026	osteopetrosis-associated transmembrane protein 1
ELLLHLIDYLVTSDGKDPEITNLIN#STR	gi|38327526	carboxypeptidase M precursor
ELLLN#TSEVTVR	gi|27735143	discoidin, CUB and LCCL domain-containing protein 1 precursor
ELN#ESENSVFQAVYGLQR	gi|157388921	transmembrane and coiled-coil domain-containing protein 3 precursor
ELSEYN#ATAIK	gi|21396504	ephrin type-B receptor 2 isoform 2 precursor
ELYEPIWQN#FTDPQLR	gi|4503273	angiotensin-converting enzyme isoform 1 precursor
EMLESNNVITFNGLAN#SSSYHTFLLDEER	gi|5174673	semaphorin-3A precursor
EMLTN#GTFEYIR	gi|148539888	beta-1,4-mannosyl-glycoprotein 4-beta-N-acetylglucosaminyltransferase
EN#ATVPENEEEIIR	gi|29789287	inositol 1,4,5-trisphosphate receptor-interacting protein precursor
ENGMPMDIVN#TSGR	gi|6912646	neuroplastin isoform b precursor
EN#GTLVQVATISGNMFNQMAK	gi|5729772	ceroid-lipofuscinosis neuronal protein 5
EN#GTN#LTFIGDK	gi|31377765	transmembrane protein 87A isoform 1 precursor
EN#LTAPGSDSAVFFEQGTTR	gi|4557485	ceruloplasmin precursor
ENPVEFDSLFN#ESK	gi|29029537	GPI ethanolamine phosphate transferase 1
ENQPVGSSVIFMN#STDLDTGFNGK	gi|66346693	protocadherin Fat 1 precursor
ENVHSWLILQVN#ATDALGVPCTENDYK	gi|4507157	sortilin-related receptor preproprotein
EPGSN#VTMSVDAECVPMVR	gi|5031863	galectin-3-binding protein precursor
EPQPSPTDQPSFSN#LTAFPGGAK	gi|20631977	cyclic AMP-dependent transcription factor ATF-6 beta isoform a
EQCQDPSKVPSENKDLYEYSWVQGPLHSN#ETDR	gi|24638433	nicastrin precursor
EQNDN#TSN#GTNDYIGSVEK	gi|116295256	heparan-sulfate 6-O-sulfotransferase 2 isoform L
EQQLESCACN#ETDNSCK	gi|73747889	disintegrin and metalloproteinase domain-containing protein 17 preproprotein
EQTADYN#VTIIATDK	gi|11128037	protocadherin gamma-B1 isoform 1 precursor
ERFDN#ETFR	gi|4502427	bone morphogenetic protein 7 precursor
ERFN#ISTPAFR	gi|38045910	laminin subunit alpha-3 isoform 1 precursor
ERN#ITEAVMVSENFDIEAPNYLSK	gi|261490708	phosphatidylinositol-glycan biosynthesis class X protein isoform 1 precursor
ERVEN#TSHPGEMQVTIQNLMPATVYIFR	gi|157311649	neogenin isoform 1 precursor
ESWGQESNAGN#QTVVR	gi|9845238	UDP-GlcNAc:betaGal beta-1,3-N-acetylglucosaminyltransferase 2
ETHLETN#FTLK	gi|28610147	interleukin-6 receptor subunit beta isoform 1 precursor
ETSISQN#ASFSTDTSIVLSEVPTGTTAEVSR	gi|83367077	mucin-16
EVETPKNELYN#ITVLAIDKDDR	gi|148539846	desmocollin-3 isoform Dsc3a preproprotein
EVIDTN#LTTLR	gi|38045910	laminin subunit alpha-3 isoform 1 precursor
EYLEQISTLIN#TTDR	gi|4503443	endothelin-converting enzyme 1 isoform 1
FAEIN#GSALCSYNLKPSEYTTSPK	gi|18034692	choline transporter-like protein 1
FCLVTN#LTMDSVLVTVK	gi|83367077	mucin-16
FDGEPCDLSLN#ITWYLK	gi|31377765	transmembrane protein 87A isoform 1 precursor
FDN#ETFR	gi|4502427	bone morphogenetic protein 7 precursor
FDTHEYRN#ESR	gi|7019555	transmembrane protein 2 isoform a
FEAEHISN#YTALLLSR	gi|39777608	semaphorin-4B precursor
FFPSHCAVAVFDN#TTVK	gi|13787217	protocadherin Fat 2 precursor
FFPYAN#GTLGIR	gi|4557707	neural cell adhesion molecule L1 isoform 1 precursor
FFQIN#GSTGEMSTVQELDYEAQQHFHVK	gi|13787217	protocadherin Fat 2 precursor
FFQLN#YSTTVQENSPIGSK	gi|13787217	protocadherin Fat 2 precursor
FGEFGN#YSLLVK	gi|150378452	heparan-alpha-glucosaminide N-acetyltransferase precursor
FGHFTGFN#SSTLK	gi|31881740	solute carrier family 12 member 9 isoform 1
FGHSPLVN#LTGGLSHASDVVLYHQHK	gi|126012562	prolow-density lipoprotein receptor-related protein 1 precursor
FGSVLGN#YSCAAQGTQGGSK	gi|13325064	cadherin EGF LAG seven-pass G-type receptor 2 precursor
FGTCSQLCN#NTK	gi|126012562	prolow-density lipoprotein receptor-related protein 1 precursor
FHVN#YTQPLVAVK	gi|49574491	sodium/potassium-transporting ATPase subunit beta-2
FINYN#QTVSR	gi|22095331	ER membrane protein complex subunit 1 isoform 1 precursor
FITSILYENNVITIDLVQN#SSQK	gi|218505670	epithelial cell adhesion molecule precursor
FIVESLTPSSLSLMHSPPGTQN#ISEIN#LSPMEISTFR	gi|51477714	alpha-mannosidase 2
FKLEWLGN#CSGLNDETYGYK	gi|4502277	sodium/potassium-transporting ATPase subunit beta-1
FLEPYN#DSIQAQK	gi|49574491	sodium/potassium-transporting ATPase subunit beta-2
FLGITPFLN#YTR	gi|4505353	bifunctional heparan sulfate N-deacetylase/N-sulfotransferase 2
FLKPYTLEEQKN#LTVCPDGALFEQK	gi|4502281	sodium/potassium-transporting ATPase subunit beta-3
FLN#DSIVDPVDSEWFGFYR	gi|4506031	palmitoyl-protein thioesterase 1 isoform 1 precursor
FLN#ESYK	gi|197116348	prostatic acid phosphatase isoform TM-PAP precursor
FLN#ESYKHEQVYIR	gi|197116348	prostatic acid phosphatase isoform TM-PAP precursor
FLN#FTQNVFTDSIFEK	gi|20143971	toll-like receptor 6 precursor
FLNN#GTCTAEGK	gi|119392081	complement factor I preproprotein
FLQIPWN#HSVLHHEEMIGK	gi|4507665	protein-tyrosine sulfotransferase 1
FLSSSPHLPPSSYFN#ASGR	gi|5729770	tripeptidyl-peptidase 1 preproprotein
FLSYN#VTR	gi|31982953	protein O-glucosyltransferase 1 precursor
FLTEVEKN#ATALYHVEAFK	gi|19923761	multiple inositol polyphosphate phosphatase 1 isoform 1 precursor
FLTN#GSVSVVLETTEK	gi|51317380	D-glucuronyl C5-epimerase
FMGDMVSFEEDRIN#ATVWK	gi|224809316	G-protein coupled receptor 56 isoform a precursor
FN#DTEVLQR	gi|4557373	biotinidase precursor
FN#ISLQK	gi|122937400	teneurin-3
FN#ISTPAFR	gi|38045910	laminin subunit alpha-3 isoform 1 precursor
FN#ITDNVMQHLLSPLFQR	gi|83367077	mucin-16
FN#LTETSEAEIHQSFQHLLR	gi|50659080	alpha-1-antichymotrypsin precursor
FNPN#ISWQPIPVHTVPITEDR	gi|4557010	lysosomal acid phosphatase isoform 1 precursor
FNSPTTQDLVYIDPSPDYCVRN#ESTGSLGTQGR	gi|40806205	protein Wnt-5a isoform 1
FN#SSGQCEVPLVR	gi|5032099	smoothened homolog precursor
FN#SSSSSLEEK	gi|11968009	nucleotide exchange factor SIL1 precursor
FN#STEYQVVTR	gi|126012562	prolow-density lipoprotein receptor-related protein 1 precursor
FN#STQIAAMAPEHEEPR	gi|153791362	glucoside xylosyltransferase 1 isoform 1
FPTHYMPYN#ESVSFEDR	gi|11034849	ectonucleotide pyrophosphatase/phosphodiesterase family member 5 precursor
FQLLN#FSSSELK	gi|148664190	cell adhesion molecule 1 isoform 1 precursor
FQN#ITDFWK	gi|24233517	inhibitor of nuclear factor kappa-B kinase-interacting protein isoform 1
FQTVDSSNIDGFVN#CTK	gi|54792100	receptor tyrosine-protein kinase erbB-3 isoform 1 precursor
FQVN#NTRPPHVQLLR	gi|110611239	alpha-L-iduronidase precursor
FSADLGYN#GTR	gi|31543204	proton-coupled folate transporter isoform 1
FSGVN#DTDFR	gi|32455271	protein O-mannosyl-transferase 2
FTNDLLN#SSSAIYSK	gi|61743940	probable G-protein coupled receptor 110 isoform 1 precursor
FVEQN#ETAIN#ITTYPDQENNK	gi|5901956	follistatin-related protein 1 precursor
FVGTPEVN#QTTLYQR	gi|4507509	metalloproteinase inhibitor 1 precursor
FVHVN#TSAVLK	gi|116517319	protein O-mannosyl-transferase 1 isoform a
FVKN#ITSWK	gi|6912420	heparan sulfate 2-O-sulfotransferase 1 isoform 1
FVN#STGYLTEAEK	gi|38202250	sulfatase-modifying factor 1 isoform 1 precursor
FVSQTNGNLYIANVEASDKGN#YSCFVSSPSITK	gi|28373117	contactin-1 isoform 1 precursor
FYATN#DTEVAQSNFEALQDFFR	gi|119395729	lysosomal protective protein isoform a precursor
FYN#YTLCR	gi|240255483	extracellular sulfatase Sulf-2 isoform a precursor
GAEYVISPLPN#ASAPAAQR	gi|21265058	A disintegrin and metalloproteinase with thrombospondin motifs 15 preproprotein
GAFFPLTERN#WSLPNR	gi|5453914	phospholipid transfer protein isoform a precursor
GAN#VSWEPGFDGGYLQR	gi|205277425	protein turtle homolog A isoform a precursor
GASMVQQFPN#LTGTVHLESLTLTGTK	gi|157694513	leucine-rich repeat-containing G-protein coupled receptor 4 precursor
GASN#LTWR	gi|4504061	N-acetylglucosamine-6-sulfatase precursor
GDPSVISVN#GTDFTFR	gi|7019555	transmembrane protein 2 isoform a
GEGLN#KTVIGDYLGER	gi|4758968	cytohesin-3
GEN#FTETDVK	gi|122056623	major prion protein preproprotein
GETASLLCN#ISVR	gi|16445029	immunoglobulin superfamily member 8 precursor
GETLEIGN#YSFYALDNQNLR	gi|119395736	insulin receptor isoform Long preproprotein
GEYFVN#VTTR	gi|116295258	integrin alpha-2 precursor
GEYQINFHIVNWN#LSNPDPTSSEYITLLR	gi|83367077	mucin-16
GFLALYQTVAVN#YSQPISEASR	gi|289547636	complement C1r subcomponent-like protein precursor
GFN#ASYIR	gi|50355941	G-protein coupled receptor 126 isoform beta 1 precursor
GFN#ATYHVR	gi|32490559	low-density lipoprotein receptor-related protein 10 precursor
GFSTQVLLGDVYQSPCTMAQRPQNFN#SSAR	gi|45827718	ectonucleoside triphosphate diphosphohydrolase 2 isoform 1
GFVKDSITGSGLEN#ATISVAGINHN#ITTGR	gi|22202611	carboxypeptidase D isoform 1 precursor
GFYLDGSDTIVCDSN#STWDPPVPK	gi|27502423	membrane cofactor protein isoform 2 precursor
GGAEAMLVVN#NSVLFPPSGN#RSEFPDVK	gi|21314755	signal peptide peptidase-like 2A precursor
GGGDPWTN#GSGLALCQR	gi|10092597	mucolipin-1
GHAHLAALVNHESYN#FSHR	gi|50959176	endoplasmic reticulum-Golgi intermediate compartment protein 2
GHDLNEDGLVSWEEYKN#ATYGYVLDDPDPDDGFNYK	gi|314122177	calumenin isoform c precursor
GHHVSQEPWN#SSITLTSQAGAVFQSFAK	gi|4503349	deoxyribonuclease-2-alpha precursor
GHPQILEAAGN#ASAGTVLLR	gi|104487006	receptor-type tyrosine-protein phosphatase S isoform 1 precursor
GHTLTLN#FTRN#ATR	gi|112380628	lysosome-associated membrane glycoprotein 1 precursor
GHTN#GTKPLDGFDVWK	gi|38569405	arylsulfatase B isoform 1 precursor
GIGN#WSDSK	gi|4507157	sortilin-related receptor preproprotein
GILESLMCN#ESSMQSLR	gi|64085121	thyrotropin receptor isoform 1 precursor
GILN#ATISVAEINHPVTTYK	gi|22202611	carboxypeptidase D isoform 1 precursor
GIN#ASSMAWAR	gi|21264602	laminin subunit alpha-5 precursor
GIPYYESSLANN#VTSVVGHLSTSLFTFK	gi|54792129	discoidin, CUB and LCCL domain-containing protein 2 precursor
GISDN#YTLALITYALSSVGSPK	gi|115529484	CD109 antigen isoform 1 precursor
GIVENMGINANN#MSDFIMK	gi|238859593	UDP-glucose:glycoprotein glucosyltransferase 2 precursor
GKAN#STGTLVITDPTR	gi|28373117	contactin-1 isoform 1 precursor
GKDLDTDFTNN#ASQPETK	gi|22202611	carboxypeptidase D isoform 1 precursor
GKDLGQGQGQVQVQN#GTLR	gi|205277425	protein turtle homolog A isoform a precursor
GKEGHFYYN#ISEVK	gi|5453914	phospholipid transfer protein isoform a precursor
GKNN#QTECFNFIR	gi|157388902	semaphorin-4C precursor
GLCVN#ASAVSR	gi|62243068	insulin-like growth factor-binding protein 3 isoform b precursor
GLLN#LTYYQQIQVQK	gi|24850115	sialate O-acetylesterase isoform 1 precursor
GLLYAASHSGVVQVPMAN#CSLYR	gi|39777608	semaphorin-4B precursor
GLN#VSCLSVQGSASIVAPLLLR	gi|34147487	GDP-fucose protein O-fucosyltransferase 2 isoform C precursor
GLPSLTSVSWN#ISVPR	gi|30410805	CUB domain-containing protein 1 isoform 1 precursor
GLQGQAQVDSN#SSLILRPLTK	gi|205277425	protein turtle homolog A isoform a precursor
GLSPGN#YSVR	gi|119395736	insulin receptor isoform Long preproprotein
GLSYN#FTHLDGYLDLLR	gi|110611239	alpha-L-iduronidase precursor
GLTAVPEGLSAFTQALDISMNN#ITQLPEDAFK	gi|157694513	leucine-rich repeat-containing G-protein coupled receptor 4 precursor
GN#ATLLLNLR	gi|189571657	glycerophosphodiester phosphodiesterase domain-containing protein 5
GNELSLVLLN#ASTGELK	gi|13325064	cadherin EGF LAG seven-pass G-type receptor 2 precursor
GN#ETIVNLIHSTR	gi|4503009	carboxypeptidase E preproprotein
GN#LTFTAQYLSYR	gi|24430215	interleukin-10 receptor subunit beta precursor
GN#LTYGYVTILN#GSDIR	gi|56237029	integrin alpha-5 precursor
GN#SSLYPVASPSLQQLVVEK	gi|126157508	inactive N-acetylated-alpha-linked acidic dipeptidase-like protein 2
GN#STHGCSSEETFLIDCR	gi|4505865	urokinase plasminogen activator surface receptor isoform 1 precursor
GN#TSGVLVVLTK	gi|94681046	metal transporter CNNM4 precursor
GNVISSHGNPILLN#SSIPEDPSIK	gi|4505467	5-nucleotidase isoform 1 preproprotein
GPDLSN#CTSPWVNQVAQK	gi|57165355	latrophilin-1 isoform 1 precursor
GPEPQVTIGYSGEDYPQAIPELEGIEILN#SSAVLVK	gi|4557707	neural cell adhesion molecule L1 isoform 1 precursor
GPGEVIPGGN#HSLYSLK	gi|11545853	solute carrier family 28 member 3
GPIDIN#MSEIGMDYIHELFSKDPTIK	gi|4757828	beta-1,4-galactosyltransferase 5
GPLANPIWN#VTGFTGR	gi|208431815	receptor-type tyrosine-protein phosphatase kappa isoform a precursor
GPSTPLPEDPNWN#VTEFHTTPK	gi|157266300	aminopeptidase N precursor
GPTN#NTCVVR	gi|27477134	nuclear pore membrane glycoprotein 210 precursor
GPWQEQIVSDPFLVVSN#TSTFVPYEIK	gi|4557707	neural cell adhesion molecule L1 isoform 1 precursor
GPYTLQGLLGCELGPDN#TSVPTAK	gi|209862839	IgG receptor FcRn large subunit p51 precursor
GQAQN#YSTLLLEEASAR	gi|28872814	semaphorin-4G isoform 1 precursor
GQSYSVN#VTFTSNIQSK	gi|5453678	epididymal secretory protein E1 precursor
GQTALGFLYASGLGVN#SSQAK	gi|19923669	protein sel-1 homolog 1 isoform 1 precursor
GSALHEDIYVLHEN#GTLEIPVAQK	gi|81158226	neuronal cell adhesion molecule isoform A precursor
GSATFN#STEGVLQHLLRPLFQK	gi|83367077	mucin-16
GSEGGN#GSNPVAGLETDDHGGK	gi|38348322	membrane protein FAM174A precursor
GSFPGLAVEPGSNLDMEDEEEEELTMEMFGN#SSIK	gi|74229025	membralin isoform 1
GSHYVAIVFESN#SSYLGR	gi|145580631	sulfhydryl oxidase 2 precursor
GSIVVEWTN#NTLPLEPCPK	gi|294997282	dystroglycan preproprotein
GSKDN#ATDSVPLR	gi|126012562	prolow-density lipoprotein receptor-related protein 1 precursor
GSN#YSEILDK	gi|5901956	follistatin-related protein 1 precursor
GSN#YSEILDKYFK	gi|5901956	follistatin-related protein 1 precursor
GSPAWEPPAN#DTR	gi|332635065	chondroitin sulfate proteoglycan 5 isoform 3 precursor
GSSVILN#CSAYSEPSPK	gi|157311649	neogenin isoform 1 precursor
GSVALVIHN#ITAQEN#GTYR	gi|5921461	butyrophilin subfamily 2 member A1 isoform 1 precursor
GSWLLGNIN#QTGYFR	gi|7019561	thyrotropin-releasing hormone-degrading ectoenzyme
GTAN#LSETIR	gi|18426911	tyrosine-protein phosphatase non-receptor type substrate 1 precursor
GTDPSLSPSPAALPPAPGTELSYLN#GTFR	gi|110624774	C-type mannose receptor 2 precursor
GTEVN#TTVIGENDPIDEVQGFLFGK	gi|9910280	UDP-glucose:glycoprotein glucosyltransferase 1 precursor
GTEWLVN#SSR	gi|28373117	contactin-1 isoform 1 precursor
GTN#FTHLVADR	gi|157388902	semaphorin-4C precursor
GTQLFEDNYALAVLDNGDPLN#NTTPVTGASPGGLR	gi|54792096	receptor tyrosine-protein kinase erbB-2 isoform a precursor
GTSSHGLATN#SSGAK	gi|260656043	Neuropathy target esterase
GVFITN#ETGQPLIGK	gi|119393891	lysosomal alpha-glucosidase preproprotein
GVISNVN#ETSLILEWSEPR	gi|17975768	ephrin type-B receptor 3 precursor
GVLMVGN#ETTYEDGHGSR	gi|222831612	choline transporter-like protein 2 isoform 1
GVLMVGN#ETTYEDGHGSRK	gi|222831612	choline transporter-like protein 2 isoform 1
GVLMVGN#ETTYEDGHGSRKN#ITDLVEGAK	gi|222831612	choline transporter-like protein 2 isoform 1
GVLPGEDWTVFQSN#HSTYEPVLLAK	gi|4505351	bifunctional heparan sulfate N-deacetylase/N-sulfotransferase 1
GVN#VTMPAQPGTPPLSSTQLQIDPSLHEFQLVDLSR	gi|126012571	basement membrane-specific heparan sulfate proteoglycan core protein precursor
GVTHLN#ISGLK	gi|126012562	prolow-density lipoprotein receptor-related protein 1 precursor
GVTNDLLSIQGNTGPSWIN#KTER	gi|153218487	KDEL motif-containing protein 2 precursor
GVVTDEQGIPIAN#ATISVSGINHGVK	gi|53692189	adipocyte enhancer-binding protein 1 precursor
GWAAPGPEPTYPN#STILPTPDTGPTGIK	gi|187829871	leucine-rich repeat-containing protein 8A
GWLPPNLFN#CTSITFSELK	gi|13325064	cadherin EGF LAG seven-pass G-type receptor 2 precursor
GWN#WTSGFNK	gi|4758400	folate receptor alpha precursor
GYFQVNQN#STSSHLGSS	gi|56699463	protein-tyrosine sulfotransferase 2 precursor
GYLTSFEMFN#STYK	gi|4557427	ectonucleoside triphosphate diphosphohydrolase 5 precursor
GYN#ISWELGNEPNSFLK	gi|148746204	heparanase isoform 1 preproprotein
GYN#VTYWR	gi|4557707	neural cell adhesion molecule L1 isoform 1 precursor
GYPEAEVFWQDGQGVPLTGN#VTTSQMANEQGLFDVHSVLR	gi|67188443	CD276 antigen isoform a precursor
GYVEGVHN#SSIALSDCFGLR	gi|4501915	disintegrin and metalloproteinase domain-containing protein 9 precursor
GYYN#QSEAGSHTLQSMYGCDVGPDGR	gi|17986001	major histocompatibility complex, class I, B precursor
HAVYWN#SSNQHLR	gi|4826708	ephrin-A3 precursor
HEGQEPFLQWLMLLSN#ESALPHVHTVSYGDDEDSLSSAYIQR	gi|5729770	tripeptidyl-peptidase 1 preproprotein
HFFN#VSDELALVTIVK	gi|31657142	integrin alpha-1 precursor
HFN#DSGACVPR	gi|54792100	receptor tyrosine-protein kinase erbB-3 isoform 1 precursor
HFN#TSLVFPR	gi|54633317	thioredoxin domain-containing protein 11
HFN#YTSLIAFHCK	gi|119964726	cation-independent mannose-6-phosphate receptor precursor
HGAVVN#ESHHDALVEDIFDKEDEDKDGFISAR	gi|8923659	peptidyl-prolyl cis-trans isomerase FKBP14 precursor
HGLESASDHHGN#FSITMR	gi|62339432	platelet receptor Gi24 precursor
HGNLYDLKPLGLN#DTIVSAGEYTYYFR	gi|119964726	cation-independent mannose-6-phosphate receptor precursor
HIDMADFIANN#GTVPGCPAK	gi|13325064	cadherin EGF LAG seven-pass G-type receptor 2 precursor
HIN#LTTLSVAGGFR	gi|46240862	GPI inositol-deacylase
HIVIN#GSSFGADGFPYVQVLK	gi|47524173	fibroblast growth factor receptor 4 isoform 1 precursor
HLDLSN#NSLVSLTYVSFR	gi|262205665	trophoblast glycoprotein precursor
HLELAGENPSSDIN#CTK	gi|148277029	beta-1,3-galactosyl-O-glycosyl-glycoprotein beta-1,6-N-acetylglucosaminyltransferase
HLLEN#STASVSEAER	gi|4503443	endothelin-converting enzyme 1 isoform 1
HLLEN#STASVSEAERK	gi|4503443	endothelin-converting enzyme 1 isoform 1
HLN#ASNPTEPATIIFTAAR	gi|21450775	torsin-1A-interacting protein 2 isoform b
HLN#STDDADRIPFQEDWMK	gi|34147487	GDP-fucose protein O-fucosyltransferase 2 isoform C precursor
HMLALAPN#STAR	gi|257196142	piezo-type mechanosensitive ion channel component 1
HMN#SSEQAHTATMLLDTLEEGAFVLADNLLEPTR	gi|6912464	latrophilin-2 precursor
HN#FTASLLTLR	gi|30089935	transmembrane protein 132A isoform a precursor
HNIIPIFAVTN#YSYSYYEK	gi|54607035	integrin beta-4 isoform 1 precursor
HNN#ITSISTGSFSTTPNLK	gi|219521831	amphoterin-induced protein 2 precursor
HPDAVAWAN#LTNAIR	gi|229093316	putative phospholipase B-like 2 isoform 1 precursor
HPGN#FSSLSCDYFAVN#QSR	gi|56237029	integrin alpha-5 precursor
HQVSIN#NTAVMQR	gi|38788416	laminin subunit alpha-1 precursor
HSGIN#SSNAEVLALFN#VTEADAGEYICK	gi|221316638	fibroblast growth factor receptor 2 isoform 2 precursor
HSTAEETATLVMAPPLEEGLGGAMEEMQPLHEDN#FSR	gi|122891870	melanoma inhibitory activity protein 3 precursor
HVVYWN#SSNPR	gi|33359686	ephrin-A4 isoform b precursor
HWPESNTEAHVEN#ITFYQNQEDFSTVSSK	gi|153792110	protein HEG homolog 1 precursor
HYEN#HSAIMLGIK	gi|116014339	olfactomedin-like protein 2A precursor
HYQVTGYGIN#GTGDSNDFWR	gi|32455271	protein O-mannosyl-transferase 2
IAVDTAAGPYQN#HTVVFLGSEK	gi|11991660	semaphorin-6A precursor
IAVDWESLGYN#ITR	gi|208431815	receptor-type tyrosine-protein phosphatase kappa isoform a precursor
IAVIQEGAFTN#LTSLR	gi|221136957	SLIT and NTRK-like protein 2 precursor
IAVIQEGAFTN#LTSLRR	gi|221136957	SLIT and NTRK-like protein 2 precursor
IAVQFGPGFSWIAN#FTK	gi|169790833	lysosome-associated membrane glycoprotein 2 isoform C precursor
IDAYNEAAVSILN#SSTR	gi|170784865	CAS1 domain-containing protein 1 precursor
IDGGPVILLQAGTPHN#LTCR	gi|166295173	kin of IRRE-like protein 1 precursor
IDGSQNFN#ETWENYK	gi|7656888	angiopoietin-related protein 3 preproprotein
IDGVNVDTHHIPVN#VTLR	gi|59823631	probable G-protein coupled receptor 125 precursor
IDLN#STSHVN#ITTR	gi|50355941	G-protein coupled receptor 126 isoform beta 1 precursor
IDSTGN#VTNELR	gi|21450861	attractin isoform 1 preproprotein
IDVNSWIEN#FTK	gi|54112390	voltage-dependent calcium channel subunit alpha-2/delta-1 precursor
IENIGESNLNVLYN#CTVASTGGTDTK	gi|4504655	interleukin-18 receptor 1 precursor
IEQN#ATNTFLVYTEEDLGDLLK	gi|5174497	endothelial lipase precursor
IESINQQLLPLGN#ISDNMDR	gi|38045910	laminin subunit alpha-3 isoform 1 precursor
IETILLN#GTDR	gi|126012562	prolow-density lipoprotein receptor-related protein 1 precursor
IETILLN#GTDRK	gi|126012562	prolow-density lipoprotein receptor-related protein 1 precursor
IEVANLN#GTSR	gi|119709832	low-density lipoprotein receptor-related protein 5 precursor
IFIFN#QTGIEAK	gi|94421469	thioredoxin domain-containing protein 15 precursor
IFLYSGEPTYLGN#ETSVFGPTGNK	gi|5729772	ceroid-lipofuscinosis neuronal protein 5
IFMNTCNPSSLTQQWLFEHTN#STVLEK	gi|38195091	polypeptide N-acetylgalactosaminyltransferase 10
IFNIDSGN#GSIFTSK	gi|4826673	cadherin-6 preproprotein
IGPFAN#TTK	gi|122937400	teneurin-3
IGPGEPLELLCN#VSGALPPAGR	gi|16445029	immunoglobulin superfamily member 8 precursor
IGTFCSN#GTVSR	gi|30410805	CUB domain-containing protein 1 isoform 1 precursor
IIFAN#VSVR	gi|21361315	transmembrane 9 superfamily member 1 isoform a precursor
IIISPEEN#VTLTCTAENQLER	gi|68163411	CD166 antigen isoform 1 precursor
IITVSTN#GSIHSPR	gi|9994187	platelet-derived growth factor C precursor
IIYGVEN#SSTFLECSPK	gi|5174673	semaphorin-3A precursor
IKISSLQTTEKN#DTVAGQGER	gi|4504763	integrin alpha-V isoform 1 precursor
IKLDN#YSTQELGK	gi|4505467	5-nucleotidase isoform 1 preproprotein
IKN#VTNQIALLK	gi|126157508	inactive N-acetylated-alpha-linked acidic dipeptidase-like protein 2
IKTN#ITLVCKPGDLESAPVLR	gi|119964726	cation-independent mannose-6-phosphate receptor precursor
ILAPAYFILGGN#QSGEGCVITR	gi|189011546	acid ceramidase isoform b
ILESERFDTHEYRN#ESR	gi|7019555	transmembrane protein 2 isoform a
ILFWAQN#FSVAYK	gi|17136148	V-type proton ATPase subunit S1 precursor
ILFYNVVVENLDKPSSSELHSIPAPAN#STK	gi|4557040	oncostatin-M-specific receptor subunit beta isoform 1 precursor
ILGDKVN#NTAVIEK	gi|110681719	transmembrane protein 245
ILIWEDGSLEINN#ITR	gi|28373117	contactin-1 isoform 1 precursor
ILLAEN#FTGCLGR	gi|112420992	protein crumbs homolog 2 precursor
ILPGGN#TSFDVVFLAR	gi|150456424	transmembrane protein 131
ILSN#LSCNVK	gi|50355941	G-protein coupled receptor 126 isoform beta 1 precursor
ILSYN#VSCSSDEETQSLSEIPDPQHK	gi|189083786	leukemia inhibitory factor receptor precursor
ILTADN#QTYMAVQGSTAYLLCK	gi|4557707	neural cell adhesion molecule L1 isoform 1 precursor
ILTN#NSQTPILSPQEVVSCSQYAQGCEGGFPYLIAGK	gi|189083844	dipeptidyl peptidase 1 isoform a preproprotein
IN#DSVTLNEKPFSVEDTYLLCPAPILK	gi|14149904	anthrax toxin receptor 1 isoform 1 precursor
IN#ISSPGSPVTAVTDDFK	gi|4827008	solute carrier family 15 member 1
IN#ITEMYK	gi|94536854	thrombospondin type-1 domain-containing protein 4 precursor
INLN#ESMQVVSR	gi|157694524	plexin-D1 precursor
IN#VTTLKDDGDISK	gi|20302038	glycoprotein integral membrane protein 1 precursor
IN#YTVPQSGTFK	gi|115529484	CD109 antigen isoform 1 precursor
IPLVN#ISLLPK	gi|38202211	N-acetylglucosamine-1-phosphotransferase subunits alpha/beta precursor
IPN#NTQWVTWSPVGHK	gi|18765694	dipeptidyl peptidase 4
IQCTLSNPLFN#TTSSIILTTCIPSSGHSR	gi|4502677	lymphocyte function-associated antigen 3 isoform 1
IQNILSEKPTVTTVYANN#GSVLQGSSVASVYDGK	gi|66529294	serum paraoxonase/arylesterase 2 isoform 1
IQN#YSVMDICDYDESSGR	gi|18765694	dipeptidyl peptidase 4
IQPIILVADEGWTIVLN#ESSQK	gi|7662358	bis(5-adenosyl)-triphosphatase ENPP4 precursor
IQQESLGSAPLMGDDHPN#ASR	gi|122891870	melanoma inhibitory activity protein 3 precursor
IREGSGYFFLN#TSTADVVK	gi|27477134	nuclear pore membrane glycoprotein 210 precursor
IRIN#TTADEKDPTNPFR	gi|4557251	disintegrin and metalloproteinase domain-containing protein 10 precursor
ISDN#NTEFLLNFNEFIDR	gi|54112390	voltage-dependent calcium channel subunit alpha-2/delta-1 precursor
ISDN#NTEFLLNFNEFIDRK	gi|54112390	voltage-dependent calcium channel subunit alpha-2/delta-1 precursor
ISEEFLKN#ISASAR	gi|258614003	low affinity cationic amino acid transporter 2 isoform 3
ISELKN#GSFSGLSLLER	gi|59823631	probable G-protein coupled receptor 125 precursor
ISGSEVEELSEVSN#FTMEDINNKK	gi|256000767	extracellular matrix protein FRAS1 isoform 1 precursor
ISN#LTIVQAEIK	gi|42491362	inhibitor of nuclear factor kappa-B kinase-interacting protein isoform 2
ISNN#FTGLEWDLNVR	gi|115647957	torsin-3A precursor
ISSLQTTEKN#DTVAGQGER	gi|4504763	integrin alpha-V isoform 1 precursor
ITAPTLAPGN#STAVVPTPTPPSK	gi|39812106	serine incorporator 3 precursor
ITATDGENFATPLYIN#ITVAASHK	gi|66346693	protocadherin Fat 1 precursor
ITCVGN#DSFIGLSSVR	gi|4759146	slit homolog 2 protein precursor
ITDSEDKALMN#GSESR	gi|38372919	basigin isoform 1 precursor
ITEKQDILN#NSLTTLSQDITK	gi|42491362	inhibitor of nuclear factor kappa-B kinase-interacting protein isoform 2
ITIAIN#NTLTPTTLPPGTIQYLTDTSK	gi|268834192	beta-glucuronidase precursor
ITIAIN#NTLTPTTLPPGTIQYLTDTSKYPK	gi|268834192	beta-glucuronidase precursor
ITLLELEDVPLQPQVQFLDKPILN#STSTLHR	gi|40255043	beta-galactosidase-1-like protein precursor
ITNENFVDAYENSN#STEFVSLASK	gi|11415040	suppressor of tumorigenicity 14 protein
ITN#ISAVEMTPLPTCLQFNR	gi|40255005	plexin domain-containing protein 2 precursor
ITNLRVN#LTR	gi|119703755	laminin subunit beta-2 precursor
ITNN#QTGQMVFSETVITSVGDEEGRR	gi|40548389	dickkopf-related protein 3 precursor
ITSN#ATSDLNIK	gi|4506913	beta-sarcoglycan
ITTLEAGCFDN#LSSSLLVVK	gi|7662320	leucine-rich repeats and immunoglobulin-like domains protein 2 precursor
ITVHGN#GSLDIR	gi|139948432	matrix-remodeling-associated protein 5 precursor
IVDVN#LTSEGK	gi|190194386	transmembrane 9 superfamily member 3 precursor
IVDVN#LTSEGKVK	gi|190194386	transmembrane 9 superfamily member 3 precursor
IVPLENGEIVVSLVNGRPGAMN#FSYSPLLR	gi|21264602	laminin subunit alpha-5 precursor
IVTDWQN#YTR	gi|33598924	scavenger receptor class A member 3 isoform 1
IVTPEEYYN#VTVQ	gi|4503037	protein CREG1 precursor
IVVN#VSDTNDHAPWFTASSYK	gi|66346693	protocadherin Fat 1 precursor
IVVYNQPYIN#YSR	gi|7706387	carboxypeptidase Q preproprotein
IVYN#ITLPLHPNQGIIEHR	gi|256000767	extracellular matrix protein FRAS1 isoform 1 precursor
IYEDEVPFGTNCN#LTITSR	gi|311771583	LY75-CD302 fusion protein isoform 1 precursor
IYLRN#ESEFR	gi|56237029	integrin alpha-5 precursor
IYNTPSASYLEVTPDSENDFGNYN#CTAVNR	gi|336285440	neural cell adhesion molecule 1 isoform 5 precursor
IYN#WSGYPLLVQK	gi|110227598	phospholipase B-like 1 precursor
IYWVN#ESAGFLFAPIER	gi|256000767	extracellular matrix protein FRAS1 isoform 1 precursor
K.AGLQAFFQVQECN#K.S	gi|11034849	ectonucleotide pyrophosphatase/phosphodiesterase family member 5 precursor
K.DVTVIEGEVATISCQVN#K.S	gi|148664190	cell adhesion molecule 1 isoform 1 precursor
K.EITGFLLIQAWPEN#R.T	gi|156104869	chloride channel protein 2 isoform 1
K.ETLVTLFDN#R.T	gi|189083851	lysosomal acid lipase/cholesteryl ester hydrolase precursor
K.GQTEIQVNCPPAVTEN#K.T	gi|20070191	transmembrane protein 59 precursor
K.GSQWSDIEEFCN#R.S	gi|22749415	dolichyl-diphosphooligosaccharide--protein glycosyltransferase subunit STT3A isoform a
K.IIQQTWN#R.T	gi|31542947	60 kDa heat shock protein, mitochondrial
K.INQFNLMASEMIALN#R.S	gi|31982953	protein O-glucosyltransferase 1 precursor
K.ISDKLNFGLGN#R.S	gi|34878777	E3 ubiquitin-protein ligase BRE1A
K.LLHALGGDDFLGMLN#R.T	gi|4506919	N-sulphoglucosamine sulphohydrolase precursor
K.LLQDFFNGKELN#K.S	gi|4507157	sortilin-related receptor preproprotein
K.LNFGLGN#R.S	gi|4507677	endoplasmin precursor
K.MPFPIDQDFYVSPTFQDLLN#R.T	gi|4557485	ceruloplasmin precursor
K.QLVHSFAEGQDQGSAYAN#R.T	gi|46559761	PDZ domain-containing protein 4
K.SAEGTFFIN#K.T	gi|46909600	disintegrin and metalloproteinase domain-containing protein 15 isoform 6 preproprotein
K.STMDSFTLIMQTYN#R.T	gi|54112390	voltage-dependent calcium channel subunit alpha-2/delta-1 precursor
K.SYAGFLTVN#K.T	gi|54607031	cell adhesion molecule 2 isoform 3 precursor
K.VFIDQIN#R.S	gi|5729877	heat shock cognate 71 kDa protein isoform 1
K.VMSWWDYGYQITAMAN#R.T	gi|67188443	CD276 antigen isoform a precursor
K.YDLPASINFILN#K.T	gi|7656967	cadherin EGF LAG seven-pass G-type receptor 1 precursor
K.YRDFQHLLN#R.T	gi|7669492	glyceraldehyde-3-phosphate dehydrogenase isoform 1
KADIFIN#GSQLGEDFIQLHK	gi|148746204	heparanase isoform 1 preproprotein
KALENGIN#VTVSQSTTVVNGR	gi|122937400	teneurin-3
KDFEDLYTPVN#GSIVIVR	gi|189458817	transferrin receptor protein 1
KDIN#TTAQNIMFYDMGSGSTVCTIVTYQMVK	gi|195976805	hypoxia up-regulated protein 1 precursor
KDN#ITAHN#ISWR	gi|134288865	sodium bicarbonate cotransporter 3 isoform a
KDSLN#SSHPISSSVQSSEQIEEMFDSLSYFK	gi|61742777	leucyl-cystinyl aminopeptidase isoform 1
KDVN#YTQIVVDR	gi|214010218	semaphorin-4D isoform 1 precursor
KENGMPMDIVN#TSGR	gi|6912646	neuroplastin isoform b precursor
KFLN#ESYKHEQVYIR	gi|197116348	prostatic acid phosphatase isoform TM-PAP precursor
KFN#ITESVLQGLLKPLFK	gi|83367077	mucin-16
KFN#STQIAAMAPEHEEPR	gi|153791362	glucoside xylosyltransferase 1 isoform 1
KFN#TTER	gi|83367077	mucin-16
KGTN#FTHLVADR	gi|157388902	semaphorin-4C precursor
KIESINQQLLPLGN#ISDNMDR	gi|38045910	laminin subunit alpha-3 isoform 1 precursor
KIN#SSLQLPDR	gi|39777608	semaphorin-4B precursor
KKENGMPMDIVN#TSGR	gi|6912646	neuroplastin isoform b precursor
KLAFAFGDRN#CSTITLQN#ITR	gi|294997282	dystroglycan preproprotein
KLDFIILN#ETK	gi|18765694	dipeptidyl peptidase 4
KLDIGQYLLN#VSVTDGK	gi|66346693	protocadherin Fat 1 precursor
KLGDCISEDSYPDGN#ITWYRNGK	gi|68163411	CD166 antigen isoform 1 precursor
KLHVGYLQPLVAVQVSFAPN#NTGK	gi|4502281	sodium/potassium-transporting ATPase subunit beta-3
KLLLSIN#VTNTR	gi|6006011	integrin alpha-3 isoform b precursor
KLN#YTLSQGHR	gi|157266300	aminopeptidase N precursor
KLSPPVVETLPTVDLHEESSNAVVDSETVEN#ISSSSTSEITPISK	gi|7656940	SUN domain-containing ossification factor isoform 1 precursor
KMVLWN#DSVVR	gi|42741679	V-type proton ATPase 116 kDa subunit a isoform 2
KN#FTFGNIR	gi|10304987	beta-1,3-galactosyltransferase 1
KN#ITDLVEGAK	gi|222831612	choline transporter-like protein 2 isoform 1
KN#LTLMATTSQLPK	gi|4557010	lysosomal acid phosphatase isoform 1 precursor
KN#QSIGLIQPFATNGK	gi|61742777	leucyl-cystinyl aminopeptidase isoform 1
KQELSRDN#ATLQATLHAAR	gi|21264602	laminin subunit alpha-5 precursor
KQNNGAFN#ETLFR	gi|189458817	transferrin receptor protein 1
KQYDSFTFTASKN#GTYK	gi|256985100	TRAM adaptor with GOLD domain isoform 1 precursor
KSDTQNLLYN#VSTGR	gi|4503617	exostosin-like 3
KSGVIN#LTEEVLWVK	gi|61742777	leucyl-cystinyl aminopeptidase isoform 1
KTNELPSDSSSSSDLIN#TSIASSTMDVTK	gi|83367077	mucin-16
KTN#MSLDTSSVTPTNTPSSPGSTHLLQSSK	gi|83367077	mucin-16
KTYAIYDLLDTAMIN#NSR	gi|23397653	GPI transamidase component PIG-T isoform 1 precursor
KVEAEALN#ATAIR	gi|104487006	receptor-type tyrosine-protein phosphatase S isoform 1 precursor
KVEVEAVN#STSVK	gi|4506309	receptor-type tyrosine-protein phosphatase delta isoform 1 precursor
KVPSN#STETVIESDEFRPGIR	gi|189083786	leukemia inhibitory factor receptor precursor
KWN#VTSLETLK	gi|53988380	mesothelin isoform 2 preproprotein
KYQTLN#CSVNVNCVNIR	gi|119395740	integrin alpha-6 isoform a precursor
LAFAFGDRN#CSTITLQN#ITR	gi|294997282	dystroglycan preproprotein
LAFQNMN#GSEYFVK	gi|53988380	mesothelin isoform 2 preproprotein
LAN#DTLIYFTSDQGAHVEEVSSK	gi|53831991	steryl-sulfatase precursor
LAN#NTHQHVFDDLR	gi|17149834	sortilin isoform 1 preproprotein
LASPPSQGEVPPGPLPEAVLALYN#STR	gi|63025222	transforming growth factor beta-1 precursor
LATIAN#FSALGLEPGR	gi|4507005	solute carrier family 22 member 5
LAVTN#TTMTGTVLK	gi|485836756	stromal interaction molecule 1 isoform 1 precursor
LCLELAN#TSIR	gi|4507531	toll-like receptor 3 precursor
LCLNN#DTK	gi|4507047	high affinity cationic amino acid transporter 1
LDAPTNLQFVN#ETDSTVLVR	gi|47132557	fibronectin isoform 1 preproprotein
LDFIILN#ETK	gi|18765694	dipeptidyl peptidase 4
LDGCHLPFFPLPLDN#SSQPSELGGR	gi|112420992	protein crumbs homolog 2 precursor
LDMSQN#VSLVTAELSK	gi|118582260	equilibrative nucleoside transporter 1
LDN#YSTQELGK	gi|4505467	5-nucleotidase isoform 1 preproprotein
LEDKQPGNMAGNFN#LSLQGCDQDAQSPGILR	gi|30410805	CUB domain-containing protein 1 isoform 1 precursor
LEHQFAVGEDSGRN#LSAPVTLNLR	gi|51873064	lysosomal alpha-mannosidase isoform 1 precursor
LEMVN#ESVLAGPGYTTLAGLDLSHNLLTSISPTAFSR	gi|384551658	tsukushin precursor
LEN#LSSSEMGYTATLTR	gi|119393891	lysosomal alpha-glucosidase preproprotein
LEN#WTDASR	gi|41152506	prostaglandin F2 receptor negative regulator precursor
LEQTPLQFTHLEYN#VTVQENSAAK	gi|66346693	protocadherin Fat 1 precursor
LEWLGN#CSGLNDETYGYK	gi|4502277	sodium/potassium-transporting ATPase subunit beta-1
LFDDWMASN#GTQSLPTDVMTTVFK	gi|61742777	leucyl-cystinyl aminopeptidase isoform 1
LFLPN#LTLFLDSR	gi|21264332	alpha-N-acetylgalactosaminide alpha-2,6-sialyltransferase 1
LFN#LTSTFSR	gi|145580617	alpha-(1,3)-fucosyltransferase 11 precursor
LFN#TSVEVLPFDNPQSDKEALQEGR	gi|16915936	alpha-1,3-mannosyl-glycoprotein 4-beta-N-acetylglucosaminyltransferase B isoform 2
LFPATGN#STNLADDGK	gi|59823631	probable G-protein coupled receptor 125 precursor
LFQN#CSELFK	gi|31377765	transmembrane protein 87A isoform 1 precursor
LGAIN#STLSN#QSK	gi|239582761	ERO1-like protein beta precursor
LGAN#GSHIPQTSSVFSIEVYPEDHSELQSVR	gi|294997282	dystroglycan preproprotein
LGDCISEDSYPDGN#ITWYRNGK	gi|68163411	CD166 antigen isoform 1 precursor
LGDVEVNAGQN#ATFQCIATGR	gi|208431815	receptor-type tyrosine-protein phosphatase kappa isoform a precursor
LGFLGN#QSQGCLPAR	gi|6005902	thrombospondin-3 isoform 1 precursor
LGFQVDNVLAMDMPQVN#ISVQGEVPR	gi|54607020	tyrosine-protein kinase RYK isoform 1 precursor
LGGFTQEN#NTIDSGELDIGR	gi|122937400	teneurin-3
LGGFTQEN#NTIDSGELDIGRR	gi|122937400	teneurin-3
LGGWN#ITGPWAK	gi|4503443	endothelin-converting enzyme 1 isoform 1
LGIYADMGN#FTCMGYPGTTLDK	gi|4557781	alpha-N-acetylgalactosaminidase precursor
LGNTISSLFGGGTTPDAKEN#GTDTVQEEEESPAEGSK	gi|195976805	hypoxia up-regulated protein 1 precursor
LGNTISSLFGGGTTPDAKEN#GTDTVQEEEESPAEGSKDEPGEQVELK	gi|195976805	hypoxia up-regulated protein 1 precursor
LGQAPANWYN#DTYPLSPPQR	gi|20270339	soluble calcium-activated nucleotidase 1
LGTEALSTN#HSVIVNSPVITAAINK	gi|163792198	latrophilin-3 precursor
LHELVLSFNN#LTR	gi|54607118	leucine-rich repeats and immunoglobulin-like domains protein 1 precursor
LHGLHLSN#ITVGGIPGPAGGVAR	gi|13325064	cadherin EGF LAG seven-pass G-type receptor 2 precursor
LHIAQPEN#NTHVALFK	gi|46240862	GPI inositol-deacylase
LHRLN#ASIADLQSQLR	gi|21264602	laminin subunit alpha-5 precursor
LHVGYLQPLVAVQVSFAPN#NTGK	gi|4502281	sodium/potassium-transporting ATPase subunit beta-3
LHVQEEQN#LTSELIVQGR	gi|38788416	laminin subunit alpha-1 precursor
LIASN#VTETMGIN#GSAYR	gi|255652944	Niemann-Pick C1 protein precursor
LIDNN#KTEK	gi|110224476	proactivator polypeptide isoform b preproprotein
LIDNN#KTEKEILDAFDK	gi|110224476	proactivator polypeptide isoform b preproprotein
LINKFN#SSSSSLEEK	gi|11968009	nucleotide exchange factor SIL1 precursor
LIN#STFLHNK	gi|216548223	synaptic vesicle glycoprotein 2A isoform 1
LIPLGVFTGLSN#LTK	gi|50263044	leucine-rich repeat and immunoglobulin-like domain-containing nogo receptor-interacting protein 1 precursor
LKVPLDLNAFDVQASPNEGFVNQN#ITIFYR	gi|15022801	hyaluronidase-2 precursor
LLAN#SSMLGEGQVLR	gi|343183403	seizure 6-like protein 2 isoform 5 precursor
LLDAENKVVAN#GTGTQGQLK	gi|268834192	beta-glucuronidase precursor
LLDGDLTSDPSYFQN#VTGCSNYYNFLR	gi|83641874	probable serine carboxypeptidase CPVL precursor
LLDMLQYYLN#LTEANLK	gi|24307911	acid sphingomyelinase-like phosphodiesterase 3a precursor
LLEPDKEMENFYVFHN#GSLVIESPR	gi|219521831	amphoterin-induced protein 2 precursor
LLETLEN#ISTLVPPTALPLN#FSR	gi|61743940	probable G-protein coupled receptor 110 isoform 1 precursor
LLGGGDEEAIRPQMQQILDFETALAN#ITIPQEK	gi|4503443	endothelin-converting enzyme 1 isoform 1
LLIAGTN#SSDLQQILSLLESNK	gi|61744477	4F2 cell-surface antigen heavy chain isoform b
LLIAGTN#SSDLQQILSLLESNKDLLLTSSYLSDSGSTGEHTK	gi|61744477	4F2 cell-surface antigen heavy chain isoform b
LLKNN#ESLDEGLR	gi|50355941	G-protein coupled receptor 126 isoform beta 1 precursor
LLLGGLPESGTIYN#FSGCISNVFVQR	gi|21264602	laminin subunit alpha-5 precursor
LLLSIN#VTNTR	gi|6006011	integrin alpha-3 isoform b precursor
LLLVDFSSQALFQDKN#SSQVLGEK	gi|224809316	G-protein coupled receptor 56 isoform a precursor
LLN#ATHQIGCQSSISGDTGVIHVVEK	gi|24638433	nicastrin precursor
LLN#CTAPGPDAAAR	gi|21717816	solute carrier family 15 member 4
LLN#GSQR	gi|342837704	prolyl 3-hydroxylase 1 isoform 3 precursor
LLN#ITNPVLNQEIEAFSLSEDTSSGLPEDR	gi|22749021	UDP-GalNAc:beta-1,3-N-acetylgalactosaminyltransferase 2 isoform 1 precursor
LLN#LTNPEASTSVLMAVTHTLTQYPFDFR	gi|45827718	ectonucleoside triphosphate diphosphohydrolase 2 isoform 1
LLNN#LTSIK	gi|145309326	laminin subunit gamma-1 precursor
LLN#TTDVYLLPSLNPDGFER	gi|22202611	carboxypeptidase D isoform 1 precursor
LLPAFN#TTSGLPYPR	gi|163310725	ER degradation-enhancing alpha-mannosidase-like protein 3 precursor
LLQVVYLHSNN#ITK	gi|4502403	biglycan preproprotein
LLTSHGMGIQVPLN#ATEFNYLCPAIINQIDAR	gi|153252201	zinc transporter ZIP6 isoform 1 precursor
LMAVN#VTYSSTGQIASIQR	gi|122937400	teneurin-3
LMVDSMGN#TSLVVPENCR	gi|13787217	protocadherin Fat 2 precursor
LNAIN#ITSALDR	gi|150378454	epsilon-sarcoglycan isoform 1
LN#ASIADLQSQLR	gi|21264602	laminin subunit alpha-5 precursor
LN#ASLPALLLIR	gi|17136148	V-type proton ATPase subunit S1 precursor
LN#DTYVNVGLYSTK	gi|195972881	transmembrane protein 194A isoform a
LN#ETHIFN#GSNWIMLIYK	gi|4505061	cation-dependent mannose-6-phosphate receptor isoform 1 precursor
LN#FTLR	gi|94536786	methyltransferase-like protein 22
LN#GSLATFSTDQELR	gi|4826694	integral membrane protein DGCR2/IDD isoform 1 precursor
LN#GTDPIVAADSK	gi|126012562	prolow-density lipoprotein receptor-related protein 1 precursor
LN#GTDPIVAADSKR	gi|126012562	prolow-density lipoprotein receptor-related protein 1 precursor
LN#ITNIWVLDYFGGPK	gi|4503037	protein CREG1 precursor
LN#ITQEGPK	gi|522838254	EGF domain-specific O-linked N-acetylglucosamine transferase isoform a precursor
LN#ITQEGPKDGK	gi|522838254	EGF domain-specific O-linked N-acetylglucosamine transferase isoform a precursor
LNLQTSTSIPN#VTEMK	gi|116295258	integrin alpha-2 precursor
LN#LTSPDLFWLVFR	gi|21264602	laminin subunit alpha-5 precursor
LN#LTTDPK	gi|54633312	Golgi apparatus protein 1 isoform 1 precursor
LNN#ITIIGPLDMK	gi|197116389	transmembrane protein 106B
LNNNELETIPNLGPVSAN#ITLLSLAGNR	gi|40255157	leucine-rich repeats and immunoglobulin-like domains protein 3 isoform 2 precursor
LN#NSTGLQSSSVSQTK	gi|153792110	protein HEG homolog 1 precursor
LNPTVTYGN#DSFSAK	gi|167466198	intercellular adhesion molecule 1 precursor
LN#QTEPVAGNYYPVNTR	gi|51873064	lysosomal alpha-mannosidase isoform 1 precursor
LN#VSHTGVPLGEEYILVFSR	gi|31542693	glycosyltransferase-like domain-containing protein 2 precursor
LN#YSLPTGQWVGVQLPR	gi|153946395	tenascin precursor
LN#YTVLIGSTPCTLTVSETQLLCEAPN#LTGQHK	gi|262118282	plexin-A1 precursor
LPEN#QTSPGESPER	gi|66932902	sterol regulatory element-binding protein cleavage-activating protein
LPN#STIYVVEPGYLGFTVHPGDR	gi|27477134	nuclear pore membrane glycoprotein 210 precursor
LPSGMLVISN#ATEGDGGLYR	gi|157311649	neogenin isoform 1 precursor
LPTTVLN#ATAK	gi|49472828	protein YIPF3
LPVNPN#FTLK	gi|4826671	cadherin-18 isoform 1 preproprotein
LQDEQEEVLNVNLEGN#LTLEGVTR	gi|31543106	basal cell adhesion molecule isoform 1 precursor
LQFDDN#GTYTCQVK	gi|21536337	myelin protein zero-like protein 2 precursor
LQFQVLVQHPQN#ESNK	gi|30410805	CUB domain-containing protein 1 isoform 1 precursor
LQGLENWGQDPGVSAN#ASK	gi|19923830	pre-B-cell leukemia transcription factor-interacting protein 1
LQMSIMVTMEN#FSK	gi|196114949	transmembrane protein 131-like isoform 1 precursor
LQN#MTVDECFQSR	gi|190341095	transmembrane protein 63C
LQNN#ISYQMADIHHLK	gi|29826289	protein CASC4 isoform a
LQPVRGN#ETLR	gi|38788193	sphingosine 1-phosphate receptor 3
LQQDVLQFQKN#QTNLER	gi|29550838	Golgi membrane protein 1
LRAN#QSWEDSNTDLVPAPAVR	gi|153792495	growth/differentiation factor 15 precursor
LRPDDSKN#FSIQVR	gi|47078292	integrin beta-3 precursor
LRPIIISMN#YSLPLR	gi|6006011	integrin alpha-3 isoform b precursor
LSAVNSIFLSHN#NTK	gi|17978491	CD97 antigen isoform 1 preproprotein
LSFGSN#SSDFK	gi|40255043	beta-galactosidase-1-like protein precursor
LSGN#LTLLR	gi|262118282	plexin-A1 precursor
LSGNNLHN#ASIPEHLAYGSVITVK	gi|32455271	protein O-mannosyl-transferase 2
LSHDAN#ETLPLHLYVK	gi|149363636	plexin-B2 precursor
LSITN#ETFR	gi|14042945	TM2 domain-containing protein 1 precursor
LSITN#ETFRK	gi|14042945	TM2 domain-containing protein 1 precursor
LSLEDHDIDQGVSSN#SSYLK	gi|71043500	beta-1,4-N-acetylgalactosaminyltransferase 3
LSN#LTEGMLR	gi|116268101	protein phosphatase 1 regulatory subunit 29 precursor
LSPPVVETLPTVDLHEESSNAVVDSETVEN#ISSSSTSEITPISK	gi|7656940	SUN domain-containing ossification factor isoform 1 precursor
LSQAQGN#LSVLETR	gi|55953133	immunoglobulin superfamily member 3 isoform 1 precursor
LSQDFMILWLHGEN#GTGPAK	gi|61098457	NHL repeat-containing protein 3 isoform a precursor
LSSSN#ASVAWMPGADGR	gi|27597078	tyrosine-protein kinase receptor TYRO3 precursor
LSWAKPQPLN#ETAPSNLWK	gi|4506775	membrane-bound transcription factor site-1 protease preproprotein
LTGSDVNLLAENLLSPEDMVLFHN#LTQPR	gi|4504975	low-density lipoprotein receptor isoform 1 precursor
LTLN#GSK	gi|194272180	plexin-B1 precursor
LTN#VTFPTGVVTNLHGDMDK	gi|122937400	teneurin-3
LTQVPDDLPTN#ITVLN#LTHNQLR	gi|4507531	toll-like receptor 3 precursor
LTSCATN#ASICGDEAR	gi|126012562	prolow-density lipoprotein receptor-related protein 1 precursor
LTSPPEDYPEPEEVPPEVISIYN#STR	gi|208022653	transforming growth factor beta-2 isoform 1 precursor
LTSYSCVCTEPPNPSN#ETLAQWK	gi|134288865	sodium bicarbonate cotransporter 3 isoform a
LTVLQASPQDTGN#YSCHVEEWLPSPQK	gi|55953133	immunoglobulin superfamily member 3 isoform 1 precursor
LTVN#LTNDR	gi|28610147	interleukin-6 receptor subunit beta isoform 1 precursor
LVAFAGSFVSDPSNTAN#VSTSGLEVYPSR	gi|205277425	protein turtle homolog A isoform a precursor
LVALAVIDEKN#TSVEHTR	gi|38505222	protein disulfide-isomerase TMX3 precursor
LVAN#ESVPFETSCR	gi|64085083	transmembrane prolyl 4-hydroxylase isoform c
LVEAAEAHAQQLGQLALN#LSSIILDVNQDR	gi|21264602	laminin subunit alpha-5 precursor
LVGYLDRNLEKN#STK	gi|110224476	proactivator polypeptide isoform b preproprotein
LVN#VTIHFR	gi|10092597	mucolipin-1
LVPPGGN#KTQYDEIGIPVALLSYK	gi|41281782	signal peptide peptidase-like 2B isoform 2 precursor
LVQAEYWHDPIKEDVYRN#HSIFLADINQER	gi|4506031	palmitoyl-protein thioesterase 1 isoform 1 precursor
LVQLFPN#DTSLK	gi|14589866	aspartyl/asparaginyl beta-hydroxylase isoform a
LVQLFPN#DTSLKNDLGVGYLLIGDNDNAK	gi|14589866	aspartyl/asparaginyl beta-hydroxylase isoform a
LVSN#ASMLVSMHGAQLVTTLFLPR	gi|31542693	glycosyltransferase-like domain-containing protein 2 precursor
LWN#STFLEEYSK	gi|119395740	integrin alpha-6 isoform a precursor
LYAN#HTSLPASAR	gi|345090972	carbohydrate sulfotransferase 12
LYFGYSLLGAHPILN#QTIGR	gi|22748649	acid phosphatase-like protein 2 precursor
LYGYSLGN#ISSNLISFTEVDDAETLHK	gi|94681046	metal transporter CNNM4 precursor
LYNNGFTSVQGYAFN#GTK	gi|64085121	thyrotropin receptor isoform 1 precursor
LYWELSN#LTNGIQELGPYTLDR	gi|83367077	mucin-16
MAAALN#ATGRPIAFSCSWPAYEGGLPPR	gi|4557781	alpha-N-acetylgalactosaminidase precursor
MASHEIEIGTIFTNIN#ATDNHVHSMLK	gi|33598924	scavenger receptor class A member 3 isoform 1
MDFLLFN#YSAPSYLR	gi|23097238	carbohydrate sulfotransferase 13 precursor
MDGCTLTDEQLLYSFN#LSSLSTSTFK	gi|119964726	cation-independent mannose-6-phosphate receptor precursor
MDPPCTN#TTAASTYLNNPYVR	gi|119395729	lysosomal protective protein isoform a precursor
MELSMGPIQAN#HTGTGLLLTLQPEQK	gi|54607043	glucosylceramidase isoform 1 precursor
MGHN#YTFTVQAR	gi|4507157	sortilin-related receptor preproprotein
MHIFQN#GSLVIHDVAPEDSGR	gi|393715082	inactive tyrosine-protein kinase 7 isoform e
MHLN#GSNVQVLHR	gi|126012562	prolow-density lipoprotein receptor-related protein 1 precursor
MIEN#GSLSFLPTLR	gi|4502403	biglycan preproprotein
MLEAYN#LTEK	gi|93141047	collagen alpha-1(XII) chain long isoform precursor
MLN#TSSLLEQLNEQFNWVSR	gi|355594753	clusterin preproprotein
MLSAFN#ATSGK	gi|62821776	uncharacterized protein KIAA1467
MN#ITSIAPLLEK	gi|170784865	CAS1 domain-containing protein 1 precursor
MN#MSVLTLQEYEFEK	gi|13129088	elongation of very long chain fatty acids protein 6
MPSQAPTGNFYPQPLLN#SSMCLEDSR	gi|21450861	attractin isoform 1 preproprotein
MSPEDIRKWN#VTSLETLK	gi|53988380	mesothelin isoform 2 preproprotein
MTPNLLHLAPENFYISHSPN#STAGPSCTLLEEAFR	gi|4504373	beta-hexosaminidase subunit beta preproprotein
MVLWN#DSVVR	gi|42741679	V-type proton ATPase 116 kDa subunit a isoform 2
MYQVQYN#SSVDDSLVYR	gi|149773484	leucine-rich repeat and fibronectin type III domain-containing protein 1 precursor
MYSEGSDIVPQSN#ETALHYFKK	gi|19923669	protein sel-1 homolog 1 isoform 1 precursor
NALLLLADDGGFESGAYN#NSAIATPHLDALAR	gi|4506919	N-sulphoglucosamine sulphohydrolase precursor
NALLLLADDGGFESGAYN#NSAIATPHLDALARR	gi|4506919	N-sulphoglucosamine sulphohydrolase precursor
NALN#LTFHAQNVGEGGAYEAELR	gi|56237029	integrin alpha-5 precursor
N#ATLAEQAK	gi|195976805	hypoxia up-regulated protein 1 precursor
N#ATLVNEADKLR	gi|157266300	aminopeptidase N precursor
N#ATQHTAGYFGSDVK	gi|13325064	cadherin EGF LAG seven-pass G-type receptor 2 precursor
N#ATVVWMK	gi|68163411	CD166 antigen isoform 1 precursor
N#ATYGYVLDDPDPDDGFNYK	gi|314122177	calumenin isoform c precursor
N#CSTITLQN#ITR	gi|294997282	dystroglycan preproprotein
NDATEILYSHVVKPVPAHPSSN#STLNQAR	gi|23943785	sclerostin domain-containing protein 1 precursor
NDRN#SSDETFLK	gi|52694752	transmembrane glycoprotein NMB isoform a precursor
NELMLN#SSLMR	gi|54873613	agrin precursor
NELYN#ITVLAIDKDDR	gi|148539846	desmocollin-3 isoform Dsc3a preproprotein
NFPDAFEYNN#VSR	gi|38327526	carboxypeptidase M precursor
NFPDAFEYNN#VSRQPETVAVMK	gi|38327526	carboxypeptidase M precursor
N#FTALIPGTTVEILDGDSK	gi|20127446	integrin beta-5 precursor
N#FTSVHLSYVELK	gi|7019555	transmembrane protein 2 isoform a
NGIYN#ITVLASDQGGR	gi|13435364	desmocollin-2 isoform Dsc2a preproprotein
N#GSSIVDLSPLIHR	gi|119964726	cation-independent mannose-6-phosphate receptor precursor
N#GTLVAFR	gi|67190163	proteoglycan 4 isoform A precursor
N#GTNDGDYVFLTGEDSYLN#FTK	gi|5031631	lysosome membrane protein 2 isoform 1 precursor
N#GTQLQN#FTLDR	gi|83367077	mucin-16
NIEDALNQLFRN#SSIK	gi|83367077	mucin-16
NILPN#ITTTYLK	gi|378404897	P2X purinoceptor 4 isoform 1
NIN#SSCRPGPGAWLR	gi|52145310	GDH/6PGL endoplasmic bifunctional protein precursor
N#ISGVVLADHSGAFHNK	gi|24638433	nicastrin precursor
N#ISIGDSTPQQQSSPLR	gi|21618354	suppressor of cytokine signaling 5
N#ISQVLEK	gi|4557251	disintegrin and metalloproteinase domain-containing protein 10 precursor
N#ITDLVEGAK	gi|222831612	choline transporter-like protein 2 isoform 1
N#ITGLEN#FTLK	gi|94421469	thioredoxin domain-containing protein 15 precursor
N#ITIVTGAPR	gi|6006011	integrin alpha-3 isoform b precursor
N#ITLAYTLEADRDR	gi|6006011	integrin alpha-3 isoform b precursor
NIYNPPESN#ASIITDYNEEGLLLQTAFLGTSR	gi|122937400	teneurin-3
NKANIQFGDN#GTTISAVSNK	gi|5031631	lysosome membrane protein 2 isoform 1 precursor
NKDYYIISTSN#GSLEGLDNQEGGVCQTR	gi|4758250	ephrin-B2 precursor
NKYHVLHIN#TTK	gi|6912420	heparan sulfate 2-O-sulfotransferase 1 isoform 1
NLAIFDLRN#TSQKMFVNTK	gi|109150419	WD repeat-containing protein mio
NLASSCTLDSALNAASYYN#FTVLK	gi|221136774	tectonic-3 isoform a precursor
NLEKN#STKQEILAALEK	gi|110224476	proactivator polypeptide isoform b preproprotein
NLGGLETEDDYSYQGHMQSCN#FSAEK	gi|6042196	cathepsin F precursor
NLN#NSQSDVVSFR	gi|56237029	integrin alpha-5 precursor
NLN#VTSLGFR	gi|54792100	receptor tyrosine-protein kinase erbB-3 isoform 1 precursor
NLPAN#VSFVLVPFK	gi|5902082	CMP-N-acetylneuraminate-beta-galactosamide-alpha-2,3-sialyltransferase 2
NLQVYN#ATSNSLTVK	gi|93141047	collagen alpha-1(XII) chain long isoform precursor
N#LSAPVTLNLR	gi|51873064	lysosomal alpha-mannosidase isoform 1 precursor
N#LTEEMAGLDETIAK	gi|153791586	myosin-2
N#LTEILNGGVYVDQNK	gi|4885215	receptor tyrosine-protein kinase erbB-4 isoform JM-a/CVT-1 precursor
N#LTEVPTDLPAYVR	gi|262205665	trophoblast glycoprotein precursor
N#LTHLESLHLEDNALK	gi|262205665	trophoblast glycoprotein precursor
N#LTQPEVIIQPSSR	gi|40254891	V-set and immunoglobulin domain-containing protein 10 precursor
N#LTYIDPDALK	gi|64085121	thyrotropin receptor isoform 1 precursor
NMQHQN#QSLSMLDEILEDVR	gi|157388921	transmembrane and coiled-coil domain-containing protein 3 precursor
NMQHQN#QSLSMLDEILEDVRK	gi|157388921	transmembrane and coiled-coil domain-containing protein 3 precursor
N#MSFVNDLTVTQDGR	gi|24308201	adipocyte plasma membrane-associated protein
N#MSFVNDLTVTQDGRK	gi|24308201	adipocyte plasma membrane-associated protein
N#MTFDLPSDATVVLNR	gi|112380628	lysosome-associated membrane glycoprotein 1 precursor
N#MTLPGENGQNLVEWR	gi|122937400	teneurin-3
N#NTIVNELVR	gi|119393891	lysosomal alpha-glucosidase preproprotein
NNVITLN#ITGK	gi|119372308	beta-galactosidase isoform a preproprotein
NPN#GTVTVISR	gi|42560237	poliovirus receptor-related protein 1 isoform 1 precursor
NPN#LTISFTAER	gi|255652944	Niemann-Pick C1 protein precursor
NPSTN#VSVVVFDSTK	gi|38202211	N-acetylglucosamine-1-phosphotransferase subunits alpha/beta precursor
NPSTN#VSVVVFDSTKDVEDAHSGLLK	gi|38202211	N-acetylglucosamine-1-phosphotransferase subunits alpha/beta precursor
NPVGLIGAEN#ATGETDPSHSK	gi|4557373	biotinidase precursor
NPWPSN#LTLVSTN#GSSGCGR	gi|4885215	receptor tyrosine-protein kinase erbB-4 isoform JM-a/CVT-1 precursor
NQAIITDETN#DSLVAPQEK	gi|38202211	N-acetylglucosamine-1-phosphotransferase subunits alpha/beta precursor
NQELEDNVHISPN#GSIITIVGTRPSNHGTYR	gi|126012571	basement membrane-specific heparan sulfate proteoglycan core protein precursor
NQN#ESVSEIGGK	gi|154689719	protein sel-1 homolog 3
NQN#GTFKDWANAN#VSR	gi|261878497	probable lysosomal cobalamin transporter
N#QSIGLIQPFATNGK	gi|61742777	leucyl-cystinyl aminopeptidase isoform 1
N#QSLVQDMDSMVR	gi|229093316	putative phospholipase B-like 2 isoform 1 precursor
NRFDLN#TSYYIFLADGAANDGR	gi|147900821	ferric-chelate reductase 1 precursor
N#SSGPDLSWLHFYR	gi|153792110	protein HEG homolog 1 precursor
N#STIAVNSHVISVSINK	gi|6912464	latrophilin-2 precursor
N#STIEAANLAGLK	gi|48928056	heat shock 70 kDa protein 13 precursor
NTCTTGITDPPPPDGSPN#ITSVSHNSVK	gi|148728162	receptor-type tyrosine-protein phosphatase eta isoform 1 precursor
NTNENPQECFN#ASK	gi|153252201	zinc transporter ZIP6 isoform 1 precursor
NTQAAHDGSGIYSTQKN#SSEQFEK	gi|19923281	carbohydrate sulfotransferase 3
N#TSIGPLYSSCR	gi|410173860	PREDICTED: mucin-16-like
N#TSVSSLYSGCR	gi|83367077	mucin-16
N#TSWDNAGFK	gi|73747889	disintegrin and metalloproteinase domain-containing protein 17 preproprotein
N#TTEVVNTMCGYK	gi|6912530	tetraspanin-15
N#TTWQAGHNFYNVDMSYLK	gi|22538431	cathepsin B preproprotein
NVDMAGFIANN#GTR	gi|7656967	cadherin EGF LAG seven-pass G-type receptor 1 precursor
NVGPN#TTSTVISTDAFRPGVR	gi|4557040	oncostatin-M-specific receptor subunit beta isoform 1 precursor
N#VTTVLNDPNPIWLVGR	gi|443287671	transmembrane protein 231 isoform 1
N#VTYGTYLDDPDPDDGFNYK	gi|314122179	calumenin isoform d precursor
N#VTYKENIAK	gi|110611906	sodium-dependent phosphate transport protein 2B isoform a
NWQLTEEDFGN#TSGR	gi|4507047	high affinity cationic amino acid transporter 1
NYAASIYN#LSK	gi|4885505	N-acetylated-alpha-linked acidic dipeptidase 2
NYAIIKPIGFN#ETAK	gi|4504779	integrin beta-8 precursor
NYASPTTLN#ITVVK	gi|13787217	protocadherin Fat 2 precursor
NYIILN#MTENIDCEVFR	gi|7657465	podocalyxin-like protein 2 precursor
NYIVPILWLN#ETGTIGDEK	gi|188536063	platelet glycoprotein 4
NYKNPN#LTISFTAER	gi|255652944	Niemann-Pick C1 protein precursor
NYLGEAVSHN#ASLEVAILR	gi|4506569	roundabout homolog 1 isoform a precursor
QADEDIQGTQNLLTSIESETAASEETLFN#ASQR	gi|167614504	laminin subunit beta-1 precursor
QAEILEYAYHGQIAIVAPEALLAGHN#YTLK	gi|61742777	leucyl-cystinyl aminopeptidase isoform 1
QAIHVGN#QTFNDGTIVEK	gi|83641874	probable serine carboxypeptidase CPVL precursor
QAWALVGVIDGGSTSCN#ESVR	gi|7019555	transmembrane protein 2 isoform a
QCN#GTSMCWCVNTAGVR	gi|218505670	epithelial cell adhesion molecule precursor
QDFLDTYNN#LTLK	gi|15451875	UDP-GalNAc:beta-1,3-N-acetylgalactosaminyltransferase 1
QDGVSLSHDTQQWGDVLPDGN#GTYQTWVATR	gi|4557751	MHC class I polypeptide-related sequence A isoform 1 (MICA*001) precursor
QDILN#NSLTTLSQDITK	gi|42491362	inhibitor of nuclear factor kappa-B kinase-interacting protein isoform 2
QDN#ETGIYYETWNVK	gi|5729772	ceroid-lipofuscinosis neuronal protein 5
QDQQLQN#CTEPGEQPSPK	gi|5231228	ribonuclease T2 precursor
QDVN#ITVATVPSWLK	gi|393715082	inactive tyrosine-protein kinase 7 isoform e
QEAKEN#GTN#LTFIGDK	gi|31377765	transmembrane protein 87A isoform 1 precursor
QEDQLQDYRKN#NTYLVK	gi|29826289	protein CASC4 isoform a
QEEAGVRPSAGN#VSTHPSLSQRPGGSTK	gi|332205947	trans-Golgi network integral membrane protein 2 isoform 2 precursor
QEHQVLLQELPGSEHIEMLAN#ATTLAYLK	gi|6912484	group XV phospholipase A2 precursor
QELSRDN#ATLQATLHAAR	gi|21264602	laminin subunit alpha-5 precursor
QGEHLSN#STSAFSTR	gi|109150416	peroxidasin homolog precursor
QGIDFCPGQN#VSGVTTHNLEDHTK	gi|4503899	N-acetylgalactosamine-6-sulfatase precursor
QHGQFSLAVVSLN#ITSLGLR	gi|29725609	epidermal growth factor receptor isoform a precursor
QHTVTTTTKGEN#FTETDVK	gi|122056623	major prion protein preproprotein
QIATGVSDTICEPCPVGFFSN#VSSAFEK	gi|4507581	tumor necrosis factor receptor superfamily member 5 isoform 1 precursor
QIN#SSISGNLWDKDQR	gi|4758092	di-N-acetylchitobiase precursor
QKN#SSDIVQIAPQSLILK	gi|9625002	integrin beta-6 precursor
QLEEFLN#QSSPFYFWMNGDR	gi|355594753	clusterin preproprotein
QLSCVANQN#GSQADCELGNPFKR	gi|119395740	integrin alpha-6 isoform a precursor
QLVLN#LTGNTLCAGGASDEK	gi|66277202	podocalyxin isoform 1 precursor
QN#ISVTLR	gi|30410805	CUB domain-containing protein 1 isoform 1 precursor
QN#ITNQLEK	gi|23510346	glycosyltransferase 8 domain-containing protein 1
QNIVN#ATANLGQSVTLVCDAEGFPEPTMSWTK	gi|336285440	neural cell adhesion molecule 1 isoform 5 precursor
QNNGAFN#ETLFR	gi|189458817	transferrin receptor protein 1
QN#STMFSLTPENSWTPK	gi|115529484	CD109 antigen isoform 1 precursor
QPGNMAGNFN#LSLQGCDQDAQSPGILR	gi|30410805	CUB domain-containing protein 1 isoform 1 precursor
QPQYEAN#VSELATCGHLVLK	gi|13787217	protocadherin Fat 2 precursor
QPVSPVIHPPVSYN#DTAPR	gi|17136148	V-type proton ATPase subunit S1 precursor
QQLAYGIYVIHQAGN#GTFNR	gi|315467841	beta-1,4-galactosyltransferase 3
QQMENYPKNN#HTASILDR	gi|383872447	CD63 antigen isoform A
QRN#STIEAANLAGLK	gi|48928056	heat shock 70 kDa protein 13 precursor
QSIGQN#YSNVIANLR	gi|39930577	arylsulfatase K precursor
QSQFLN#VTATEDYVDPVTN#QTK	gi|255652944	Niemann-Pick C1 protein precursor
QTLFFN#GTR	gi|21686977	cell adhesion molecule 4 precursor
QTQVGIVQYGEN#VTHEFNLNK	gi|31657142	integrin alpha-1 precursor
QTTAMDFSYAN#ETVCWVHVGDSAAQTQLK	gi|126012562	prolow-density lipoprotein receptor-related protein 1 precursor
QVALQTFGN#QTTIIPAGGAGYK	gi|157388900	inositol monophosphatase 3
QVLSYGQN#LSFSFR	gi|145309326	laminin subunit gamma-1 precursor
QVTQEMLN#HTIAIR	gi|66346693	protocadherin Fat 1 precursor
QYDSFTFTASKN#GTYK	gi|256985100	TRAM adaptor with GOLD domain isoform 1 precursor
QYLSYETLYAN#GSR	gi|6005882	serine protease 23 precursor
QYN#STGDYR	gi|4507541	tetraspanin-6 isoform a
R.ASVDVFGN#R.T	gi|11968182	40S ribosomal protein S18
R.ATLSTLAVAVN#R.T	gi|122937400	teneurin-3
R.DFQHLLN#R.T	gi|13124891	polypeptide N-acetylgalactosaminyltransferase 1
R.ELAVPDGYTN#R.T	gi|166795301	prenylcysteine oxidase 1 precursor
R.ELNILFLN#K.T	gi|168693643	complement decay-accelerating factor isoform 2 precursor
R.GQFFPSEDLQEQIYLN#R.T	gi|189181666	beta-hexosaminidase subunit alpha preproprotein
R.GVTNDLLSIQGNTGPSWIN#K.T	gi|27436889	GDP-fucose protein O-fucosyltransferase 1 isoform 1 precursor
R.GVYELTHNN#K.T	gi|27545323	chondroitin sulfate synthase 2 isoform 1
R.IQPIIAVADEGWHILQN#K.S	gi|324120921	atrial natriuretic peptide receptor 3 isoform 1 precursor
R.LLVAVLTSQTTLPTLGVAVN#R.T	gi|4507157	sortilin-related receptor preproprotein
R.QVQLECVVLN#R.T	gi|46909600	disintegrin and metalloproteinase domain-containing protein 15 isoform 6 preproprotein
R.SLDNDNYVFTAPYFN#K.S	gi|50845388	annexin A2 isoform 1
R.TSPGQASTVVVIDIVDCNNHAPLFN#R.S	gi|55770844	catenin alpha-1
R.VDDEMPQHAVLSGPNLFINNLN#K.T	gi|55953133	immunoglobulin superfamily member 3 isoform 1 precursor
R.VMSWWDYGYQIAGMAN#R.T	gi|6006011	integrin alpha-3 isoform b precursor
RAEDTAGQTALTVMRPDASLQVDTVVPN#ATVSEK	gi|55953133	immunoglobulin superfamily member 3 isoform 1 precursor
RATVFAN#GSLLLTQVRPR	gi|393715082	inactive tyrosine-protein kinase 7 isoform e
RFPTHYMPYN#ESVSFEDR	gi|11034849	ectonucleotide pyrophosphatase/phosphodiesterase family member 5 precursor
RGDDLYTN#VTISLVESLVGFEMDITHLDGHK	gi|7706495	dnaJ homolog subfamily B member 11 precursor
RGVFITN#ETGQPLIGK	gi|119393891	lysosomal alpha-glucosidase preproprotein
RIAVDWESLGYN#ITR	gi|208431815	receptor-type tyrosine-protein phosphatase kappa isoform a precursor
RIGPGEPLELLCN#VSGALPPAGR	gi|16445029	immunoglobulin superfamily member 8 precursor
RIQN#YSVMDICDYDESSGR	gi|18765694	dipeptidyl peptidase 4
RKDIN#TTAQNIMFYDMGSGSTVCTIVTYQMVK	gi|195976805	hypoxia up-regulated protein 1 precursor
RLPAAN#FTR	gi|4507531	toll-like receptor 3 precursor
RLSAVNSIFLSHN#NTK	gi|17978491	CD97 antigen isoform 1 preproprotein
RMELSMGPIQAN#HTGTGLLLTLQPEQK	gi|54607043	glucosylceramidase isoform 1 precursor
RMHLN#GSNVQVLHR	gi|126012562	prolow-density lipoprotein receptor-related protein 1 precursor
RN#ASAVVLYNEER	gi|284447287	E3 ubiquitin-protein ligase RNF149 precursor
RN#ESHLIDFR	gi|109148539	gamma-glutamyltransferase 7
RN#ITLAYTLEADR	gi|6006011	integrin alpha-3 isoform b precursor
RN#ITLAYTLEADRDR	gi|6006011	integrin alpha-3 isoform b precursor
RN#MTLPGENGQNLVEWR	gi|122937400	teneurin-3
RN#NTFLSLR	gi|4503641	tissue factor isoform 1 precursor
RN#QSLVQDMDSMVR	gi|229093316	putative phospholipase B-like 2 isoform 1 precursor
RPASMLN#WTTLQR	gi|189571657	glycerophosphodiester phosphodiesterase domain-containing protein 5
RPFIN#LTAGQPTSYSLK	gi|13787217	protocadherin Fat 2 precursor
RPN#QSQPLPPSSLQR	gi|24638433	nicastrin precursor
RPPLAELAALN#LSGSR	gi|262205665	trophoblast glycoprotein precursor
RPYVSYVN#NSIAR	gi|50659093	epididymis-specific alpha-mannosidase precursor
RQDVN#ITVATVPSWLK	gi|393715082	inactive tyrosine-protein kinase 7 isoform e
RQN#ITNQLEK	gi|23510346	glycosyltransferase 8 domain-containing protein 1
RSNYN#LTVEVTDGSR	gi|13787217	protocadherin Fat 2 precursor
RTFLN#TTVEK	gi|153792110	protein HEG homolog 1 precursor
RTSIPGPDHSTESPDISTEVIPSLPISLGITESSN#MTIITR	gi|83367077	mucin-16
RYN#NTVAYGELR	gi|22538495	putative polypeptide N-acetylgalactosaminyltransferase-like protein 3
SAEFFN#YTVR	gi|4505891	procollagen-lysine,2-oxoglutarate 5-dioxygenase 3 precursor
SAEGTFFIN#KTEIEDFPR	gi|189181666	beta-hexosaminidase subunit alpha preproprotein
SALLEFACTHNLGN#CSTTAMK	gi|61742777	leucyl-cystinyl aminopeptidase isoform 1
SAN#ASFNIK	gi|393715082	inactive tyrosine-protein kinase 7 isoform e
SAN#STLAQALHWTR	gi|255918129	lipase maturation factor 2
SAVGTLSAN#SSNVIQLIIDAYNSLSSEVILENGK	gi|19743819	integrin beta-1 isoform 1D precursor
SAVSTSWLLPYN#YTWSPEK	gi|6912484	group XV phospholipase A2 precursor
SCIN#ESAIDSR	gi|116256327	neprilysin
SCVAVTSAQPQN#MSR	gi|149363636	plexin-B2 precursor
SDAVSHTGN#YTCEVTELTREGETIIELK	gi|4502673	leukocyte surface antigen CD47 isoform 1 precursor
SDEPVCASDN#ATYASECAMK	gi|7242222	follistatin isoform FST344 precursor
SDFSQTMLFQAN#TTR	gi|194097398	receptor-type tyrosine-protein phosphatase gamma
SDLNPAN#GSYPFQALR	gi|229093316	putative phospholipase B-like 2 isoform 1 precursor
SEASEGN#ITVTCR	gi|4557751	MHC class I polypeptide-related sequence A isoform 1 (MICA*001) precursor
SEELDIFAN#SSLK	gi|4507531	toll-like receptor 3 precursor
SEGAIQVN#FTLVR	gi|22202611	carboxypeptidase D isoform 1 precursor
SEQLVN#FTGK	gi|13129026	transmembrane protein 106C isoform a
SFTDLLLDDGQDN#NTQIEEDTDHNYYISR	gi|40255005	plexin domain-containing protein 2 precursor
SGDASIN#VTNLQLSDIGTYQCK	gi|4503173	coxsackievirus and adenovirus receptor isoform 1 precursor
SGIEN#STVTLSHPN#GTTSVTSILHIK	gi|90903245	OX-2 membrane glycoprotein isoform b
SGIEN#STVTLSHPN#GTTSVTSILHIKDPK	gi|90903245	OX-2 membrane glycoprotein isoform b
SGPKN#MTFDLPSDATVVLNR	gi|112380628	lysosome-associated membrane glycoprotein 1 precursor
SGVIN#LTEEVLWVK	gi|61742777	leucyl-cystinyl aminopeptidase isoform 1
SILESVTSESNFHN#YTLVSLNEEFNR	gi|24429592	chondroitin sulfate N-acetylgalactosaminyltransferase 2
SIVLEPIYWN#SSNSK	gi|4758250	ephrin-B2 precursor
SIYN#WTEEYGR	gi|93277080	transmembrane protein 260
SLCNSIISLN#TTISCSEAQK	gi|40786402	transmembrane protein 179B precursor
SLDAYPILNQAQALEN#HTEVQFQK	gi|6006011	integrin alpha-3 isoform b precursor
SLDREAETIKNGIYN#ITVLASDQGGR	gi|13435364	desmocollin-2 isoform Dsc2a preproprotein
SLEEIGIQN#YSTTSSCQAR	gi|7657465	podocalyxin-like protein 2 precursor
SLENYEPCSSQN#CSCYHGVIEEDLTPFR	gi|31982953	protein O-glucosyltransferase 1 precursor
SLGNVN#FTVSAEALESQELCGTEVPSVPEHGR	gi|66932947	alpha-2-macroglobulin precursor
SLGQFLSTEN#ATIK	gi|6912464	latrophilin-2 precursor
SLN#SSEPLFLGQTGLGTTEEMGK	gi|31542309	chondroitin sulfate synthase 1 precursor
SLTHLCLSN#NSLGNEGVNLLCRSMR	gi|158321897	NACHT, LRR and PYD domains-containing protein 5
SLTQGSLIVGDLAPVN#GTSQGK	gi|126012571	basement membrane-specific heparan sulfate proteoglycan core protein precursor
SLYVN#MTSGPGGPAAAAGGR	gi|116014336	methyltransferase-like protein 9 isoform 1 precursor
SN#LTVLR	gi|20127446	integrin beta-5 precursor
SNVIFYIVTLN#NTADHLR	gi|23510346	glycosyltransferase 8 domain-containing protein 1
SN#VTLTLR	gi|23238208	interleukin-17 receptor A precursor
SNYN#LTVEVTDGSR	gi|13787217	protocadherin Fat 2 precursor
SPGAN#LTYELHVLNQDEER	gi|221316650	ephrin type-A receptor 1 precursor
SPGTANVLDVN#NSTLMFVGGLGGQIK	gi|38788416	laminin subunit alpha-1 precursor
SPHRPILQAGLPAN#ASTVVGGDVEFVCK	gi|221316638	fibroblast growth factor receptor 2 isoform 2 precursor
SPSVDKYN#VSGTNG#TCLLASMGLQLN#LTYER	gi|112380628	lysosome-associated membrane glycoprotein 1 precursor
SQGYN#SSQDLPSLVLDFVK	gi|28872814	semaphorin-4G isoform 1 precursor
SRN#STVEYTLNK	gi|4507157	sortilin-related receptor preproprotein
SSEPVTNSPAN#LSSTSVEILATSEVTTDTEK	gi|83367077	mucin-16
SSTFYN#ITVCPVLGDIEGTPGFLQVHTPPVPVSDFR	gi|148728162	receptor-type tyrosine-protein phosphatase eta isoform 1 precursor
SSVPTTSTGVVSEEPFTLN#FTINNLR	gi|83367077	mucin-16
SSYN#ASFPSSFELSASSHSDDDVIIAK	gi|334191695	microfibril-associated glycoprotein 3 isoform 1 precursor
STLITVLN#ISEIESR	gi|4504659	interleukin-1 receptor type 1 precursor
STMDSFTLIMQTYN#RTDLLLK	gi|387598053	exostosin-like 2 isoform 3
SVHGGVPQN#VSLWAHR	gi|15022801	hyaluronidase-2 precursor
SVNILFN#LTHR	gi|4557040	oncostatin-M-specific receptor subunit beta isoform 1 precursor
SWPAVGN#CSSALR	gi|11321561	hemopexin precursor
SYN#GTTCENELPFN#VTK	gi|66346695	fibrillin-2 precursor
SYN#VTSVLFR	gi|38455402	neutrophil gelatinase-associated lipocalin precursor
SYSESSSTSSSESLN#SSAPR	gi|153792110	protein HEG homolog 1 precursor
SYSTTYEERN#ITGTR	gi|5032093	neutral amino acid transporter B(0) isoform 1
SYTLLVEAWDSSN#DTVQPDSIIEK	gi|4557679	protein jagged-1 precursor
TAADTTGLQPILNQFTPAN#ISR	gi|4504763	integrin alpha-V isoform 1 precursor
TADIN#SSEVEVLYLR	gi|47524173	fibroblast growth factor receptor 4 isoform 1 precursor
TAGAN#GTSGFFCVDEGR	gi|33695155	serine protease hepsin precursor
TAGVN#TTDKEMEVLHLR	gi|291327497	fibroblast growth factor receptor 1 isoform 14 precursor
TALWVATDHNMDN#TSTVLR	gi|31377697	procollagen galactosyltransferase 1 precursor
TAN#DTSTEAYNLLLR	gi|145309326	laminin subunit gamma-1 precursor
TAN#HSAPSLENSVQPGK	gi|109148539	gamma-glutamyltransferase 7
TASCSN#VTCWLK	gi|116295258	integrin alpha-2 precursor
TASN#LTVSVLEAEGVFEK	gi|115529484	CD109 antigen isoform 1 precursor
TATDFYAELQN#STDLGYANGNLVHGSNQK	gi|7656940	SUN domain-containing ossification factor isoform 1 precursor
TATVHLQALPAAPFN#ITVTK	gi|27597078	tyrosine-protein kinase receptor TYRO3 precursor
TAVFADQVIVGN#ASLR	gi|99028881	V-set domain-containing T-cell activation inhibitor 1 isoform 1 precursor
TAVN#CSSDFDACLITK	gi|10835165	CD59 glycoprotein preproprotein
TCPAGVMGEN#NTLVWK	gi|29725609	epidermal growth factor receptor isoform a precursor
TCSSN#LTLTSGSK	gi|30410805	CUB domain-containing protein 1 isoform 1 precursor
TDCDSSTTSLCSFPVAN#VSLTK	gi|171906569	seipin isoform 1
TDNSLLDQALQN#DTVFLNMR	gi|27477039	ICOS ligand precursor
TEAGAFEYVPDPTFEN#FTGGVK	gi|149363636	plexin-B2 precursor
TEAGAFEYVPDPTFEN#FTGGVKK	gi|149363636	plexin-B2 precursor
TEFN#KTESVQNVVVSGLLSPDGLACDWLGEK	gi|148727288	low-density lipoprotein receptor-related protein 6 precursor
TEGEN#CTVFDSQAGFSFDLSPLTK	gi|119964726	cation-independent mannose-6-phosphate receptor precursor
TEIKPVATEQLLSTFLTVGN#NTCFYGK	gi|7662150	glycosaminoglycan xylosylkinase
TEKEPLSDPVGTCYLSTDN#FTR	gi|56237029	integrin alpha-5 precursor
TFAN#GSLAFR	gi|24307871	lysosomal protein NCU-G1 isoform 1 precursor
TFAVYLN#NTGYR	gi|189571636	extracellular sulfatase Sulf-1 precursor
TFAVYLN#STGYR	gi|240255483	extracellular sulfatase Sulf-2 isoform a precursor
TFLN#TTVEK	gi|153792110	protein HEG homolog 1 precursor
TFN#ITIVEDR	gi|4504655	interleukin-18 receptor 1 precursor
TFNLN#TTEVEPCR	gi|38045910	laminin subunit alpha-3 isoform 1 precursor
TFNMNFISPFTQYN#TTR	gi|116295256	heparan-sulfate 6-O-sulfotransferase 2 isoform L
TGAFSMPEVNVDYN#ASSETLR	gi|99028881	V-set domain-containing T-cell activation inhibitor 1 isoform 1 precursor
TGALTVQN#TTQLR	gi|66346693	protocadherin Fat 1 precursor
TGEAN#LTQIYLQEALDFIK	gi|4503899	N-acetylgalactosamine-6-sulfatase precursor
TGEAN#LTQIYLQEALDFIKR	gi|4503899	N-acetylgalactosamine-6-sulfatase precursor
TGEIN#ITSIVDR	gi|119703744	desmoglein-1 preproprotein
TGIYQVLN#GSR	gi|38455385	lysosome-associated membrane glycoprotein 3 precursor
TGPVVEDSGSLLLEYVN#GSACTTSDGR	gi|119964726	cation-independent mannose-6-phosphate receptor precursor
TGVNSGVMLMN#MTR	gi|153791362	glucoside xylosyltransferase 1 isoform 1
TIICHVEGFPKPAIQWTITGSGSVIN#QTEESPYINGR	gi|68163411	CD166 antigen isoform 1 precursor
TIIGN#ETAVNVDSSHTEYTLSSLTSDTLYMVR	gi|28610147	interleukin-6 receptor subunit beta isoform 1 precursor
TILPAAAQDVYYRDEIGN#VSTSHLLILDDSVEMEIRPR	gi|4506675	dolichyl-diphosphooligosaccharide--protein glycosyltransferase subunit 1 precursor
TIN#VSNLYVGGIPEGEGTSLLTMR	gi|38788416	laminin subunit alpha-1 precursor
TIPSHAFSNLPN#ISR	gi|64085121	thyrotropin receptor isoform 1 precursor
TLAGEN#QTAFEIEELNRK	gi|145309326	laminin subunit gamma-1 precursor
TLN#SSGLPFGSYTFEK	gi|7019555	transmembrane protein 2 isoform a
TLQPQAILLFTN#ETASVSLK	gi|13787217	protocadherin Fat 2 precursor
TLSDVPSAAPQN#LSLEVR	gi|157311649	neogenin isoform 1 precursor
TLSPTGN#ISSAPK	gi|195972890	SUN domain-containing protein 1 isoform a
TLTLN#FTISNLQYSPDMGK	gi|83367077	mucin-16
TLTLVENKPIQLN#CSVK	gi|55953133	immunoglobulin superfamily member 3 isoform 1 precursor
TMENKPISLESEANLNSDKEN#ITTSNLK	gi|205360923	mucin-15 isoform a
TN#ITLVCKPGDLESAPVLR	gi|119964726	cation-independent mannose-6-phosphate receptor precursor
TN#MSLDTSSVTPTNTPSSPGSTHLLQSSK	gi|83367077	mucin-16
TN#MSLGLILTR	gi|116295258	integrin alpha-2 precursor
TNQDIPAPAN#FSQR	gi|167555123	uroplakin-3b-like protein precursor
TN#VSHVVGQLDDIRK	gi|38202211	N-acetylglucosamine-1-phosphotransferase subunits alpha/beta precursor
TPASDPHGDN#LTYSVFYTK	gi|157311649	neogenin isoform 1 precursor
TPLVQEVHQN#FSAWCSQVVR	gi|51873064	lysosomal alpha-mannosidase isoform 1 precursor
TPMTN#SSIQFLDNAFR	gi|4504061	N-acetylglucosamine-6-sulfatase precursor
TPSALALN#QTQHCK	gi|17017974	protein Wnt-11 precursor
TQDEILFSN#STR	gi|115529484	CD109 antigen isoform 1 precursor
TQN#FTLLVQGSPELK	gi|31543106	basal cell adhesion molecule isoform 1 precursor
TSIPGPDHSTESPDISTEVIPSLPISLGITESSN#MTIITR	gi|83367077	mucin-16
TSLELWMHTDPVSQKN#ESVR	gi|24638433	nicastrin precursor
TSN#ISKPGTLER	gi|110624774	C-type mannose receptor 2 precursor
TSN#SSQVSNEQDKIDAYK	gi|122891870	melanoma inhibitory activity protein 3 precursor
TSVTVSDLEPHMN#YTFTVEAR	gi|32967311	ephrin type-A receptor 2 precursor
TTDMLN#TSMEPVTNSPQNLNNPSNEILATLAATTDIETIHPSINK	gi|83367077	mucin-16
TTLPAGTLATRN#DTK	gi|112420992	protein crumbs homolog 2 precursor
TVLEN#STSYEEAK	gi|189011546	acid ceramidase isoform b
TVLEN#STSYEEAKNLLTK	gi|189011546	acid ceramidase isoform b
TVLQFVTN#LTK	gi|21359974	vitrin isoform 1 precursor
TVLTPATNHMGN#VTFTIPANR	gi|115298678	complement C3 precursor
TVSCQVQN#GSETVVQR	gi|514074416	collagen alpha-1(XXVI) chain isoform 1 precursor
TVTISDHGTVTYN#GSICGDDQNGPK	gi|169790833	lysosome-associated membrane glycoprotein 2 isoform C precursor
TVTN#TTVEDETETNEVQGFLFGK	gi|238859593	UDP-glucose:glycoprotein glucosyltransferase 2 precursor
TVTTSGTTN#NTVTPTSQPVR	gi|21361274	sialomucin core protein 24 isoform 1 precursor
TVVTYHIPQN#SSLENVDSR	gi|27477039	ICOS ligand precursor
TYAIYDLLDTAMIN#NSR	gi|23397653	GPI transamidase component PIG-T isoform 1 precursor
TYN#ASVLPVR	gi|15088795	GPI transamidase component PIG-S
TYN#ASVLPVRVEVDMVR	gi|15088795	GPI transamidase component PIG-S
TYN#GTNPDAASR	gi|5032201	tetraspanin-3 isoform 1
TYTYADTPDDFQLHN#FSLPEEDTKLK	gi|54607043	glucosylceramidase isoform 1 precursor
TYVDEVNSELVNIYTFN#HTVTR	gi|94721340	SID1 transmembrane family member 2 precursor
VAAAN#VSVTQPESTGDPNN#MTLLAEEAR	gi|145309326	laminin subunit gamma-1 precursor
VAAAN#VSVTQPESTGDPNN#MTLLAEEARK	gi|145309326	laminin subunit gamma-1 precursor
VAALTIN#GTGPATDWLSAETFESDLDETR	gi|157311649	neogenin isoform 1 precursor
VAEAVSSPAGVGVTWLEPDYQVYLN#ASK	gi|41152506	prostaglandin F2 receptor negative regulator precursor
VAFVLYNNLGPYLSTEN#ASMK	gi|163792198	latrophilin-3 precursor
VAN#GSSLVVPQGGQGTIDTAVLHLDTNLDIR	gi|47419930	chondroitin sulfate proteoglycan 4 precursor
VAN#LTEPVVLTFQHQLQPK	gi|224809316	G-protein coupled receptor 56 isoform a precursor
VAQPGINYALGTN#VSYPNNLLR	gi|5802984	N-acetyllactosaminide beta-1,3-N-acetylglucosaminyltransferase
VATSTNVYVLGTSPHVVTN#VSVVALPK	gi|205277425	protein turtle homolog A isoform a precursor
VAYSN#DSAN#WTEYQDPR	gi|167830475	lactadherin isoform a preproprotein
VCNGIGIGEFKDSLSIN#ATNIK	gi|29725609	epidermal growth factor receptor isoform a precursor
VDDEMPQHAVLSGPNLFINNLN#KTDN#GTYR	gi|148664190	cell adhesion molecule 1 isoform 1 precursor
VDIIVAN#LTVTDKDQPHTPAWNAVYR	gi|14589889	cadherin-2 preproprotein
VDN#ITDQFCN#ASVVDPACVR	gi|255652944	Niemann-Pick C1 protein precursor
VDVVICLSTTVRN#DTLQEAK	gi|54633312	Golgi apparatus protein 1 isoform 1 precursor
VDYESQSTDTQN#FSSESKR	gi|62243068	insulin-like growth factor-binding protein 3 isoform b precursor
VEDEGN#YTCLFVTFPQGSR	gi|209413726	poliovirus receptor isoform alpha precursor
VEFHWGHSN#GSAGSEHSINGR	gi|194097398	receptor-type tyrosine-protein phosphatase gamma
VEGLQGVYIATLIN#GSMNEENMR	gi|4507157	sortilin-related receptor preproprotein
VEHVTFN#FTLENQIHR	gi|216548223	synaptic vesicle glycoprotein 2A isoform 1
VEITTN#QSIIIGGLFPGTK	gi|148728162	receptor-type tyrosine-protein phosphatase eta isoform 1 precursor
VEN#GSETGPLPPELQPLLEGEVK	gi|21361163	vitamin K-dependent gamma-carboxylase isoform 1
VEN#TSHPGEMQVTIQNLMPATVYIFR	gi|157311649	neogenin isoform 1 precursor
VEYGAEGRHN#STIDVGGQK	gi|51988910	fibroblast growth factor receptor-like 1 precursor
VFAN#GTLVVK	gi|139948432	matrix-remodeling-associated protein 5 precursor
VFDLQQNLGSVN#VSTGCAPALQAQTPGLGPR	gi|21264602	laminin subunit alpha-5 precursor
VFHIHN#ESWVLLTPK	gi|21450861	attractin isoform 1 preproprotein
VFKPPSSTEALN#DSQEFPFPETPTK	gi|74229025	membralin isoform 1
VFPQVN#VTK	gi|66346698	alpha-N-acetylglucosaminidase precursor
VFPYISAMVNN#GSLSYDHER	gi|214010240	VIP36-like protein isoform 1 precursor
VFPYISVMVNN#GSLSYDHSK	gi|5803023	vesicular integral-membrane protein VIP36 precursor
VFPYISVMVNN#GSLSYDHSKDGR	gi|5803023	vesicular integral-membrane protein VIP36 precursor
VFVQTPTIN#YTLR	gi|6912484	group XV phospholipase A2 precursor
VGEEYQELQLDGFDN#ESSNK	gi|194097398	receptor-type tyrosine-protein phosphatase gamma
VGSTN#VSTLVNVHFAPR	gi|166295173	kin of IRRE-like protein 1 precursor
VILLPN#QTHYIIPK	gi|38202211	N-acetylglucosamine-1-phosphotransferase subunits alpha/beta precursor
VIN#ETWAWK	gi|195976805	hypoxia up-regulated protein 1 precursor
VIN#QTTCENLLPQQITPR	gi|11415040	suppressor of tumorigenicity 14 protein
VIQTSAAN#FSLN#NSK	gi|153792042	transmembrane protein 181
VITVN#ATDADSSAFSQLIYSITEGNIGEK	gi|66346693	protocadherin Fat 1 precursor
VIYEEATDLDKFITNTETPLNN#GSTPR	gi|31377681	tectonic-2 isoform 1 precursor
VIYN#LTEK	gi|51873031	nicalin precursor
VKN#ITDISQK	gi|189083786	leukemia inhibitory factor receptor precursor
VLASVVGTTGVSLN#LTQLPPFNVHLQTK	gi|13129114	dol-P-Man:Man(7)GlcNAc(2)-PP-Dol alpha-1,6-mannosyltransferase
VLDEVTN#GTVSVSK	gi|153791466	amphoterin-induced protein 1 precursor
VLEAVN#GTDAR	gi|21536337	myelin protein zero-like protein 2 precursor
VLGFKPKPPKN#ESLETYPVMK	gi|4502277	sodium/potassium-transporting ATPase subunit beta-1
VLGGAWDVFQLN#ESSGVVSTR	gi|7656967	cadherin EGF LAG seven-pass G-type receptor 1 precursor
VLGQSQEPNVNPASAGN#QTQK	gi|211971058	protein GPR107 isoform 1 precursor
VLHN#GTLAELQGLPHIR	gi|262205665	trophoblast glycoprotein precursor
VLLELAN#VSTHIVAFDAVLFEPSR	gi|14042970	protein ITFG3
VLLGN#ESCTLTLSESTMNTLK	gi|188595716	hepatocyte growth factor receptor isoform a precursor
VLLVLELQGLQKN#MTR	gi|88900491	neutral alpha-glucosidase AB isoform 3 precursor
VLNAIEDNGLKN#STFTYFTSDHGGHLEAR	gi|71852584	arylsulfatase D precursor
VLNKNGMVEFSVTSN#ETITVSPEYVGSR	gi|48928056	heat shock 70 kDa protein 13 precursor
VLN#LTDNTYLK	gi|52485941	integrin alpha-9 precursor
VLN#STLITCPSPGALSN#ASAPVDFFINGR	gi|157694524	plexin-D1 precursor
VLQCLN#ISVLSQK	gi|117306172	kallikrein-5 preproprotein
VLQGLLGPIFKN#TSVGPLYSGCR	gi|83367077	mucin-16
VLQGLLTPLFKN#TSVGPLYSGCR	gi|410173860	PREDICTED: mucin-16-like
VLSSIQEGTVPDN#TSSAR	gi|7657039	tumor necrosis factor receptor superfamily member 21 precursor
VLYMFNQMPLN#LTNAVATAR	gi|59823631	probable G-protein coupled receptor 125 precursor
VMELEKEIAN#ATAKPEDR	gi|116256327	neprilysin
VN#ASTTEPN#STVEQSALMR	gi|167614504	laminin subunit beta-1 precursor
VNCEERN#ITGLEN#FTLK	gi|94421469	thioredoxin domain-containing protein 15 precursor
VN#CSVYVQLEK	gi|29171747	lipid phosphate phosphohydrolase 2 isoform 3
VNDN#KTAAEEALR	gi|145309326	laminin subunit gamma-1 precursor
VN#DSNELGGLTTSGSAEVHK	gi|33359221	dyslexia-associated protein KIAA0319-like protein
VN#DSVPFHLGWN#STER	gi|153791946	uncharacterized family 31 glucosidase KIAA1161
VN#FTLEASEGCYR	gi|27477134	nuclear pore membrane glycoprotein 210 precursor
VN#ISN#YSLVMESDAGTFLPTGLQFTGSEK	gi|7706387	carboxypeptidase Q preproprotein
VN#ITYNYPVR	gi|63003930	cell cycle control protein 50B
VNKGPLANPIWN#VTGFTGR	gi|208431815	receptor-type tyrosine-protein phosphatase kappa isoform a precursor
VN#LSAPLLPK	gi|21361787	tetratricopeptide repeat protein 17
VN#LSAPLLPKEDPIFTYLSK	gi|21361787	tetratricopeptide repeat protein 17
VNRFN#STEYQVVTR	gi|126012562	prolow-density lipoprotein receptor-related protein 1 precursor
VN#STELFHVDR	gi|429836859	multiple epidermal growth factor-like domains protein 8 isoform 1 precursor
VN#TTTVNIDVSDVNDNAPVFSR	gi|66346693	protocadherin Fat 1 precursor
VN#VTVEDER	gi|4503641	tissue factor isoform 1 precursor
VNVVN#STLAEVHWDPVPLK	gi|81158226	neuronal cell adhesion molecule isoform A precursor
VN#YSLLADICNLWR	gi|4557781	alpha-N-acetylgalactosaminidase precursor
VPAN#STSNILNR	gi|260593684	glycine receptor subunit beta isoform A precursor
VPEN#ITLYTPILHTQAR	gi|13787217	protocadherin Fat 2 precursor
VPESENN#KTSN#SSQVSNEQDKIDAYK	gi|122891870	melanoma inhibitory activity protein 3 precursor
VPGN#QTSTTLK	gi|4557707	neural cell adhesion molecule L1 isoform 1 precursor
VPGN#VTAVLGETLK	gi|31377806	polymeric immunoglobulin receptor precursor
VPMLVLDPALPAN#ITLK	gi|38202211	N-acetylglucosamine-1-phosphotransferase subunits alpha/beta precursor
VPSENKDLYEYSWVQGPLHSN#ETDR	gi|24638433	nicastrin precursor
VPSENKDLYEYSWVQGPLHSN#ETDRLPR	gi|24638433	nicastrin precursor
VPVTLALN#NTLFLIEER	gi|157266300	aminopeptidase N precursor
VQAINQLGSGPDPQSVTLYSGEDYPDTAPVIHGVDVIN#STLVK	gi|27894376	neural cell adhesion molecule L1-like protein isoform 1 precursor
VQAVLTSDSPALVGSN#ITFAVNLIFPR	gi|52694752	transmembrane glycoprotein NMB isoform a precursor
VQEVLN#GTEVNLQHLTALVDCR	gi|51100978	protein tweety homolog 3
VQGN#STLLHITDLQAR	gi|55953133	immunoglobulin superfamily member 3 isoform 1 precursor
VQN#VSQSMEVLELR	gi|17157993	noelin-2 precursor
VQPFN#VTQGK	gi|169790833	lysosome-associated membrane glycoprotein 2 isoform C precursor
VQPMTASN#WTLVMEGEWMLK	gi|40254947	thioredoxin-related transmembrane protein 4 precursor
VQQVGHYPPAN#SSLSSR	gi|30089935	transmembrane protein 132A isoform a precursor
VQSDVN#ITLEFR	gi|38788416	laminin subunit alpha-1 precursor
VQVENQVQGIYFN#ITAICPDGSR	gi|4504779	integrin beta-8 precursor
VQWEKN#TTSVWYTSK	gi|119360348	tissue alpha-L-fucosidase precursor
VQYN#TTIAHVTLDKDR	gi|156139139	FAD-dependent oxidoreductase domain-containing protein 2 precursor
VRDRLN#ITVDHLEFAEDDLSHYTR	gi|167830411	atrial natriuretic peptide receptor 1 precursor
VRPQTN#ITLQIATDEDSGILLYK	gi|4759146	slit homolog 2 protein precursor
VRVPEN#ITLYTPILHTQAR	gi|13787217	protocadherin Fat 2 precursor
VSDN#ESSSN#YTYK	gi|148728162	receptor-type tyrosine-protein phosphatase eta isoform 1 precursor
VSFKN#HSALITSVVPGDYDGDSQMDVLLTYLPK	gi|21361933	T-cell immunomodulatory protein precursor
VSFSDKVN#LTLGSIWDK	gi|88900491	neutral alpha-glucosidase AB isoform 3 precursor
VSLLDN#GTLTVR	gi|139948432	matrix-remodeling-associated protein 5 precursor
VSLTN#VSISDEGR	gi|148664190	cell adhesion molecule 1 isoform 1 precursor
VSN#VSCQASVSR	gi|5453914	phospholipid transfer protein isoform a precursor
VSNYIGQAN#QSAWLTVLPK	gi|221316638	fibroblast growth factor receptor 2 isoform 2 precursor
VSVNTAN#VTLGPQLMEVTVYR	gi|52694752	transmembrane glycoprotein NMB isoform a precursor
VSVSLGQTN#LTVEPGASLQQHFILR	gi|221136774	tectonic-3 isoform a precursor
VTDEAGHPVPSQIQN#STETPSAYDLLILTTIPGLSYR	gi|50659093	epididymis-specific alpha-mannosidase precursor
VTELQLTSSELDFQPQQELMLQITN#ASLGLR	gi|5453914	phospholipid transfer protein isoform a precursor
VTGLN#CTTNHPINPK	gi|56237029	integrin alpha-5 precursor
VTLWVHPFVNYN#SSR	gi|153791946	uncharacterized family 31 glucosidase KIAA1161
VTN#DTESDINYLLK	gi|4503273	angiotensin-converting enzyme isoform 1 precursor
VTNSNANAASPLIVAGYN#VSGSVR	gi|51944971	nodal modulator 2 isoform 1 precursor
VTQN#LTLIEESLTSEFIHDIDR	gi|39725934	pigment epithelium-derived factor precursor;>Q95121 SWISS-PROT:Q95121 (Bos taurus) Pigment epithelium-derived factor precursor
VTSPN#VTTSTMEDTTISR	gi|83367077	mucin-16
VTTYCN#ETMTGWVHDVLGR	gi|189083844	dipeptidyl peptidase 1 isoform a preproprotein
VTVLGVATAPQQVLSNGVPVSN#FTYSPDTK	gi|119393891	lysosomal alpha-glucosidase preproprotein
VTVVGNEN#NSLLIESIK	gi|226371746	solute carrier family 15 member 2 isoform a
VTYRN#FTEK	gi|256600257	mucin-12 precursor
VVAN#GTGTQGQLK	gi|268834192	beta-glucuronidase precursor
VVDAVDGWMLN#SSAIR	gi|193788560	probable inactive glycosyltransferase 25 family member 3 precursor
VVFLSPAVPEEPEAYN#LTVLIEMDGHR	gi|149363636	plexin-B2 precursor
VVGGEREN#VSMVDYAHNNYQAQSAVPLR	gi|116734717	alkaline phosphatase, tissue-nonspecific isozyme isoform 1 precursor
VVLGAN#GTYSCLVR	gi|67188443	CD276 antigen isoform a precursor
VVLNYN#GTSQELVAVSGR	gi|167830411	atrial natriuretic peptide receptor 1 precursor
VVLVN#TSLGWPNGLALDYDEGK	gi|148727288	low-density lipoprotein receptor-related protein 6 precursor
VVNCQEFTLSAN#ASR	gi|150456424	transmembrane protein 131
VVTGDILTDITGHN#VSEYLLFTSDR	gi|47078218	ATP-binding cassette sub-family A member 2 isoform b
VVVLPTN#NSVSGELILEELEVFK	gi|5454048	semaphorin-3C precursor
VVVVDGKN#ESEYTVK	gi|73747889	disintegrin and metalloproteinase domain-containing protein 17 preproprotein
VWCLGN#ETR	gi|4506569	roundabout homolog 1 isoform a precursor
VWN#STFIEDYR	gi|6006011	integrin alpha-3 isoform b precursor
VWN#STFIEDYRDFDR	gi|6006011	integrin alpha-3 isoform b precursor
VWN#STFIEDYRDFDRVR	gi|6006011	integrin alpha-3 isoform b precursor
VWPDGVIPFVIGGN#FTGSQR	gi|5453579	bone morphogenetic protein 1 isoform 3 precursor
VYDPLYCESVHN#FTLPSWATEDTMTK	gi|197116348	prostatic acid phosphatase isoform TM-PAP precursor
VYGQNINN#ETWSR	gi|40068053	metal transporter CNNM2 isoform 1
VYGQVSLN#DSHNQMVVHWAGEK	gi|4507157	sortilin-related receptor preproprotein
VYIIAHVPVGYLPSSQN#ITAMR	gi|24307911	acid sphingomyelinase-like phosphodiesterase 3a precursor
VYIN#DSVELSQNEQK	gi|6042196	cathepsin F precursor
VYVDITTYNQDN#ETLEVHPPPTTTYQDVILGTR	gi|23397653	GPI transamidase component PIG-T isoform 1 precursor
VYVYALN#QTR	gi|31657142	integrin alpha-1 precursor
VYWNAPSSAPN#HTQFLVTVVEK	gi|147900821	ferric-chelate reductase 1 precursor
WGSDNTIFFTTYAN#GSCK	gi|17149834	sortilin isoform 1 preproprotein
WLVSDNFLN#ITNVAFDDR	gi|334191695	microfibril-associated glycoprotein 3 isoform 1 precursor
WN#CSTVDN#TSVFGR	gi|40806205	protein Wnt-5a isoform 1
WNN#NTISEINVK	gi|31377681	tectonic-2 isoform 1 precursor
WNRGN#ESLPER	gi|21686977	cell adhesion molecule 4 precursor
WN#VTSLETLK	gi|53988380	mesothelin isoform 2 preproprotein
WQMN#FTVR	gi|169790833	lysosome-associated membrane glycoprotein 2 isoform C precursor
WSFSN#GTSWR	gi|4557791	sialidase-1 precursor
WVSLDN#WTYSK	gi|84798622	beta-mannosidase precursor
WWHQQTN#ATQEVVR	gi|51873064	lysosomal alpha-mannosidase isoform 1 precursor
YAAVN#ITTNQAAPSEVPTLR	gi|17975768	ephrin type-B receptor 3 precursor
YAESDPTVPCN#ETR	gi|4506775	membrane-bound transcription factor site-1 protease preproprotein
YAVYWN#SSNPR	gi|4503487	ephrin-A5 precursor
YCGLGLQMN#HSIESK	gi|54792129	discoidin, CUB and LCCL domain-containing protein 2 precursor
YDN#CTTYLNPVGK	gi|166063983	interleukin-17 receptor D precursor
YEDLVLN#ETLNK	gi|9966821	Ectonucleoside triphosphate diphosphohydrolase 7
YEFCPFHN#VTQHEQTFR	gi|14249738	N-acetylglucosamine-1-phosphotransferase subunit gamma precursor
YEIDVGN#ESTTLGYYNGK	gi|148728162	receptor-type tyrosine-protein phosphatase eta isoform 1 precursor
YEIDVGN#ESTTLGYYNGKLEPLGSYR	gi|148728162	receptor-type tyrosine-protein phosphatase eta isoform 1 precursor
YELFGHAVSENGASVEDPMN#ISIIVTDQNDHKPK	gi|14589891	cadherin-3 preproprotein
YELSLHPN#LTSMTFR	gi|61742777	leucyl-cystinyl aminopeptidase isoform 1
YEQLQN#ETR	gi|4557010	lysosomal acid phosphatase isoform 1 precursor
YFFN#LSSMTCEK	gi|5730091	tissue factor pathway inhibitor 2 isoform 1 precursor
YFFN#VSDEAALLEK	gi|116295258	integrin alpha-2 precursor
YFYLQAVNSEGQN#LTR	gi|153218487	KDEL motif-containing protein 2 precursor
YGEN#NSLSVEGFR	gi|153252201	zinc transporter ZIP6 isoform 1 precursor
YGEN#NSLSVEGFRK	gi|153252201	zinc transporter ZIP6 isoform 1 precursor
YGN#MTEDHVMHLLQNADPLK	gi|68448544	HLA class II histocompatibility antigen gamma chain isoform a
YGPGEPSPVSETVVTPEAAPEKNPVDVKGEGN#ETTNMVITWKPLR	gi|4557707	neural cell adhesion molecule L1 isoform 1 precursor
YGTALVHLYVN#ETLANR	gi|27754773	protocadherin-1 isoform 2 precursor
YHGFLN#TSYHR	gi|4557010	lysosomal acid phosphatase isoform 1 precursor
YHIIVQLGN#MSK	gi|4507157	sortilin-related receptor preproprotein
YHN#LSLYTEHSVQEK	gi|226371746	solute carrier family 15 member 2 isoform a
YHVLHIN#TTK	gi|6912420	heparan sulfate 2-O-sulfotransferase 1 isoform 1
YHYN#CSLLDGTQLFTSHDYGAPQEATLGANK	gi|192448443	peptidyl-prolyl cis-trans isomerase FKBP10 precursor
YHYN#GSLMDGTLFDSSYSR	gi|192448443	peptidyl-prolyl cis-trans isomerase FKBP10 precursor
YHYN#GTFLDGTLFDSSHNR	gi|33469985	peptidyl-prolyl cis-trans isomerase FKBP9 precursor
YHYN#GTLLDGTLFDSSYSR	gi|33469985	peptidyl-prolyl cis-trans isomerase FKBP9 precursor
YHYN#GTLLDGTSFDTSYSK	gi|192448443	peptidyl-prolyl cis-trans isomerase FKBP10 precursor
YIISLDQDSVVKLEN#WTDASR	gi|41152506	prostaglandin F2 receptor negative regulator precursor
YIITWDHVVALSN#ESTVTGYK	gi|28373117	contactin-1 isoform 1 precursor
YKEGDLTLYAINLHN#VTK	gi|148746204	heparanase isoform 1 preproprotein
YKPDTLAVAVEN#GTGTDR	gi|14042970	protein ITFG3
YLGN#ATAIFFLPDEGK	gi|189163528	alpha-1-antitrypsin precursor
YLINSYDFVN#DTLSLK	gi|14042986	lactosylceramide 1,3-N-acetyl-beta-D-glucosaminyltransferase
YLIVAQLN#LSR	gi|61098457	NHL repeat-containing protein 3 isoform a precursor
YLLNLN#HSEK	gi|15451875	UDP-GalNAc:beta-1,3-N-acetylgalactosaminyltransferase 1
YLQPLLAVQFTN#LTMDTEIR	gi|4502277	sodium/potassium-transporting ATPase subunit beta-1
YMADMGQPGSLKFN#ITDNVMQHLLSPLFQR	gi|83367077	mucin-16
YMGLPTPEDNLDHYRN#STVMSR	gi|18765694	dipeptidyl peptidase 4
YMLASPDVTSILLTYN#LSNTNSCN#VSPK	gi|110835708	sodium/myo-inositol cotransporter
YN#ATVYSQAAN#GTEGQPQAIEFR	gi|148728162	receptor-type tyrosine-protein phosphatase eta isoform 1 precursor
YN#CSIESPR	gi|33636742	procollagen-lysine,2-oxoglutarate 5-dioxygenase 2 isoform 1 precursor
YN#GTVGLWR	gi|93588620	claudin domain-containing protein 1 isoform b
YN#HTGQVIIYR	gi|31657142	integrin alpha-1 precursor
YN#ISVIN#GTSPFAYDYDLTHIVAAYQER	gi|443287671	transmembrane protein 231 isoform 1
YN#LTSQDVGSGTSN#NSQACAQFLEQYFHDSDLAQFMR	gi|5729770	tripeptidyl-peptidase 1 preproprotein
YNN#NTLLYILHYDIDGPMN#CTSDMEINPLR	gi|4504763	integrin alpha-V isoform 1 precursor
YN#NTVAYGELR	gi|22538495	putative polypeptide N-acetylgalactosaminyltransferase-like protein 3
YNQETPMEICLN#GTPALAYLASAPPPLCPSGR	gi|166197683	phospholipase D3
YN#YTEDPTILR	gi|262118282	plexin-A1 precursor
YPGIFN#STTSDAFLQSK	gi|189491660	2-hydroxyacylsphingosine 1-beta-galactosyltransferase precursor
YPN#CTGGAAGYIDR	gi|150378452	heparan-alpha-glucosaminide N-acetyltransferase precursor
YQFNTNVVFSNN#GTLVDR	gi|4557373	biotinidase precursor
YQN#NSPPNNDDQWK	gi|49619237	uroplakin-1b
YQN#NSPPNNDDQWKNNGVTK	gi|49619237	uroplakin-1b
YQPIN#STHELGPLVDLK	gi|81158226	neuronal cell adhesion molecule isoform A precursor
YQTLN#CSVNVNCVNIR	gi|119395740	integrin alpha-6 isoform a precursor
YSLN#VTYNYPVHYFDGR	gi|8922720	cell cycle control protein 50A isoform 1
YSLN#VTYNYPVHYFDGRK	gi|8922720	cell cycle control protein 50A isoform 1
YSTTYEERN#ITGTR	gi|223468566	neutral amino acid transporter B(0) isoform 3
YSVAN#DTGFVDIPK	gi|22202619	cathepsin L1 isoform 1 preproprotein
YSVAN#DTGFVDIPKQEK	gi|22202619	cathepsin L1 isoform 1 preproprotein
YSVLIMAEKPVGDLSSPN#ETK	gi|41152506	prostaglandin F2 receptor negative regulator precursor
YSVQLMSFVYN#LSDTHLFPN#ASSK	gi|112380628	lysosome-associated membrane glycoprotein 1 precursor
YTLDPN#ITSAGPTK	gi|194272180	plexin-B1 precursor
YVASYLLAALGGN#SSPSAK	gi|4506671	60S acidic ribosomal protein P2
YVIN#GTYAN#ETK	gi|38348215	embigin precursor
YVNIQEVMDQWTLQMGYPVITILGN#TTAENR	gi|7019561	thyrotropin-releasing hormone-degrading ectoenzyme
YVQDQVAAPFQLSN#HTGR	gi|261337165	latent-transforming growth factor beta-binding protein 1 isoform LTBP-1L precursor
YVQN#GTYTVK	gi|116534898	desmoglein-2 preproprotein
YYN#YTLSINGK	gi|4504061	N-acetylglucosamine-6-sulfatase precursor
a"N#" indicates the identified glycosylation site.
